# Supplementary material
Source: publisher figshare collection journal article supplement (https://acs.figshare.com/ndownloader/files/24168551)
Supplement: Supplementary file 1 [file 24168551]

## Sheet: ReadMe
	DATABASE OVERVIEW (200 BINARY SYSTEMS)
	BAC=1 (26 binary systems)				BAC=2 (24 binary systems)				BAC=3 (20 binary systems)
	Component 1 (NA)	Component 2 (NA)	Sheet that contains the data		Component 1 (HA)	Component 2 (NA)	Sheet that contains the data		Component 1 (HD)	Component 2 (NA)	Sheet that contains the data
	METHANE	ETHANE	1_2		HYDROGEN SULFIDE	METHANE	1_1922		DIFLUOROMETHANE	PROPANE	1614_3
	METHANE	PROPANE	1_3		CARBON DIOXIDE	METHANE	1_909		TRIFLUOROMETHANE	ETHANE	1615_2
	METHANE	N-BUTANE	1_5		CARBON DIOXIDE	NITROGEN	905_909		TRIFLUOROMETHANE	CARBON TETRAFLUORIDE	1616_1615
	METHANE	N-HEXANE	1_11		CARBON DIOXIDE	ETHYLENE	201_909		DICHLOROMETHANE	ETHYLENE	201_1511
	METHANE	N-HEPTANE	1_17		CARBON DIOXIDE	ETHANE	909_2		DICHLOROMETHANE	n-PENTANE	1511_7
	METHANE	N-DECANE	1_56		CARBON DIOXIDE	PROPANE	909_3		DICHLOROMETHANE	CARBON TETRACHLORIDE	1511_1501
	METHANE	N-TETRACOSANE	1_77		CARBON DIOXIDE	N-BUTANE	909_5		CHLORODIFLUOROMETHANE	NITROGEN	905_1604
	NITROGEN	METHANE	905_1		CARBON DIOXIDE	CYCLOPENTANE	909_104		CHLORODIFLUOROMETHANE	PROPYLENE	202_1604
	NITROGEN	ETHANE	905_2		CARBON DIOXIDE	TOLUENE	909_502		CHLORODIFLUOROMETHANE	CARBON TETRAFLUORIDE	1616_1604
	NITROGEN	N-PENTANE	905_7		CARBON DIOXIDE	N-DECANE	909_56		CHLORODIFLUOROMETHANE	DICHLORODIFLUOROMETHANE	1604_1601
	NITROGEN	N-DECANE	905_56		CARBON DIOXIDE	N-DOTRIACONTANE	909_2082		1,1,1,2-TETRAFLUOROETHANE	ETHYL FLUORIDE	1617_2650
	ETHYLENE	XENON	201_959		ACETONE	N-PENTANE	7_1051		1,1,1,2-TETRAFLUOROETHANE	HEXAFLUOROETHANE	2693_2650
	ETHANE	PROPANE	2_3		ACETONE	BENZENE	1051_501		CHLOROFORM	BENZENE	1521_501
	ETHANE	N-HEPTANE	2_17		ACETONE	CYCLOHEXANE	1051_137		CHLOROFORM	n-HEXANE	1521_11
	ETHANE	N-HEXATRIACONTANE	2_2086		ACETONE	N-HEXANE	1051_11		CHLOROFORM	n-HEPTANE	1521_17
	ARGON	METHANE	914_1		METHYL ETHYL KETONE	BENZENE	1052_501		CHLOROFORM	1,2-DICHLOROETHANE	1521_1523
	PROPANE	ISOPENTANE	3_8		METHYL ETHYL KETONE	N-HEXANE	11_1052		CHLOROFORM	CARBON TETRACHLORIDE	1521_1501
	BENZENE	CYCLOHEXANE	501_137		METHYL TERT-BUTYL ETHER	TOLUENE	1405_502		2,3,3,3-TETRAFLUOROPROPENE	1,1,1-TRIFLUOROETHANE	1619_3608
	BENZENE	TOLUENE	501_502		METHYL TERT-BUTYL ETHER	N-HEPTANE	1405_17		PENTAFLUOROETHANE	PROPANE	1646_3
	BENZENE	N-HEPTANE	501_17		METHYL TERT-PENTYL ETHER	N-HEPTANE	1427_17		1,1,1,3,3-PENTAFLUOROBUTANE	DECAFLUOROBUTANE	1622_3606
	CYCLOHEXANE	METHYLCYCLOHEXANE	137_138		1,4-DIOXANE	CARBON TETRACHLORIDE	1501_1421
	CYCLOHEXANE	MONOCHLOROBENZENE	137_1571		ETHYL ACETATE	TOLUENE	1313_502
	N-HEXANE	CYCLOHEXANE	11_137		N-METHYL-2-PYRROLIDONE	BENZENE	501_1071
	1,2-DICHLOROETHANE	TOLUENE	1523_502		QUINOLINE	1,2,3,4-TETRAHYDRONAPHTALENE	706_1748
	1,2-DICHLOROETHANE	CARBON TETRACHLORIDE	1523_1501
	N-HEPTANE	MONOCHLOROBENZENE	17_1571
	BAC=4 (22 binary systems)				BAC=5 (18 binary systems)				BAC=6 (25 binary systems)
	Component 1 (HA) or Component 1 (HD)	Component 2 (HA) or Component 2 (HD)	Sheet that contains the data		Component 1 (SA)	Component 2 (NA)	Sheet that contains the data		Component 1 (HD)	Component 2 (HA)	Sheet that contains the data
	CARBON MONOXIDE	CARBON DIOXIDE	908_909		AMMONIA	NITROGEN	905_1911		DIFLUOROMETHANE	CARBON DIOXIDE	909_1614
	OXYGEN	CARBON DIOXIDE	901_909		WATER	NITROGEN	905_1921		DIFLUOROMETHANE	SULFUR DIOXIDE	1614_910
	CARBON DIOXIDE	HYDROGEN SULFIDE	909_1922		WATER	ETHANE	2_1921		DIFLUOROMETHANE	DIMETHYL ETHER	1614_1401
	CARBON DIOXIDE	DIMETHYL ETHER	909_1401		WATER	n-BUTANE	5_1921		TRIFLUOROMETHANE	CARBON DISULFIDE	1615_1938
	CARBON DIOXIDE	CARBON DISULFIDE	909_1938		WATER	BENZENE	1921_501		1,1,1-TRIFLUOROETHANE	DIMETHYL ETHER	1619_1401
	CARBON DIOXIDE	ETHYL ACETATE	909_1313		METHANOL	ETHANE	2_1101		DICHLOROMETHANE	CARBON DISULFIDE	1511_1938
	CARBON DIOXIDE	DIMETHYL CARBONATE	909_2391		METHANOL	PROPANE	3_1101		CHLORODIFLUOROMETHANE	CARBON DIOXIDE	909_1604
	DIMETHYL ETHER	SULFUR DIOXIDE	1401_910		METHANOL	BENZENE	1101_501		CHLORODIFLUOROMETHANE	CARBON DISULFIDE	1604_1938
	DIFLUOROMETHANE	1,1,1,2-TETRAFLUOROETHANE	1614_2650		METHANOL	n-HEXANE	1101_11		CHLORODIFLUOROMETHANE	DIMETHYL ETHER	1604_1401
	TRIFLUOROMETHANE	CHLORODIFLUOROMETHANE	1615_1604		ETHANOL	BENZENE	1102_501		1,1,1,2-TETRAFLUOROETHANE	CARBON DIOXIDE	909_2650
	1,2-EPOXYBUTANE	DIMETHYL CARBONATE	1471_2391		ETHANOL	n-HEPTANE	1102_17		CHLOROFORM	ACETONE	1051_1521
	TETRAHYDROFURAN	N,N-DIMETHYLFORMAMIDE	1479_1876		1-PROPANOL	ETHANE	2_1103		CHLOROFORM	TETRAHYDROFURAN	1521_1479
	DIETHYL ETHER	ACETONE	1402_1051		1-PROPANOL	BENZENE	1103_501		CHLOROFORM	METHYL ACETATE	1312_1521
	CARBON DISULFIDE	ACETONE	1938_1051		1-PROPANOL	n-HEXANE	11_1103		CHLOROFORM	ETHYL ACETATE	1521_1313
	THIOPHENE	SULFOLANE	1821_1845		ISOPROPANOL	2,2,4-TRIMETHYLPENTANE	1104_41		CHLOROFORM	DI-n-PROPYL ETHER	1521_1446
	CHLORODIFLUOROMETHANE	1,1,1,2-TETRAFLUOROETHANE	1604_2650		DIETHYLAMINE	BENZENE	1710_501		CHLOROFORM	DIISOPROPYL ETHER	1521_1403
	ETHYL ACETATE	1,4-DIOXANE	1313_1421		DIETHYLAMINE	MONOCHLOROBENZENE	1710_1571		CHLOROFORM	n-BUTYL ETHYL ETHER	1521_1448
	DIMETHYL CARBONATE	DIETHYL CARBONATE	2391_1392		2-BUTANOL	CYCLOHEXANE	1107_137		PENTAFLUOROETHANE	DIMETHYL ETHER	1646_1401
	TRIETHYLAMINE	1,4-DIOXANE	1706_1421						TRICHLOROETHYLENE	ETHYL ACETATE	1313_1541
	1,1,1,2-TETRAFLUOROETHANE	1,1-DIFLUOROETHANE	2650_1640						1,1,1,3,3,3-HEXAFLUOROPROPANE	DIMETHYL ETHER	1401_1620
	n-BUTYL ACETATE	N,N-DIMETHYLFORMAMIDE	1315_1876						1,1,2,2-TETRACHLOROETHANE	3-PENTANONE	1053_1529
	PENTAFLUOROETHANE	1,1,1,2-TETRAFLUOROETHANE	1646_2650						1,1,2,2-TETRACHLOROETHANE	CYCLOPENTANONE	1079_1529
									1,1,2,2-TETRACHLOROETHANE	ETHYL ACETATE	1313_1529
									1,1,1,2,3,3,3-HEPTAFLUOROPROPANE	CARBON DIOXIDE	909_2630
									1,1,1,2,3,3,3-HEPTAFLUOROPROPANE	SULFUR DIOXIDE	2630_910
	BAC=7 (16 binary systems)				BAC=8 (26 binary systems)				BAC=9 (23 binary systems)
	Component 1 (SA)	Component 2 (HD)	Sheet that contains the data		Component 1 (SA)	Component 2 (HA)	Sheet that contains the data		Component 1 (SA)	Component 2 (SA)	Sheet that contains the data
	METHANOL	HALOTHANE	1101_2640		WATER	CARBON DIOXIDE	909_1921		AMMONIA	WATER	1911_1921
	ACETONITRILE	1-HEXYNE	413_1772		WATER	DIMETHYL ETHER	1401_1921		AMMONIA	ACETONIRTILE	1911_1772
	ACETONITRILE	CHLOROFORM	1521_1772		WATER	ACETONE	1051_1921		WATER	ACETONITRILE	1921_1772
	ETHANOL	1-HEPTYNE	1102_2414		METHANOL	CARBON MONOXIDE	908_1101		WATER	ALLYL ALCOHOL	1921_1167
	ETHANOL	CHOLOROFORM	1102_1521		METHANOL	CARBON DIOXIDE	909_1101		WATER	ETHYLENEDIAMINE	1921_1741
	ACETIC ACID	CHLOROFORM	1521_1252		METHANOL	ACETONE	1101_1051		WATER	1-PENTANOL	1921_1109
	ISOPROPANOL	CHLOROFORM	1104_1521		METHANOL	THIOPHENE	1101_1821		WATER	PROPYLENE GLYCOL MONOMETHYL ETHER	1921_3854
	ISOPROPANOL	TRICHLOROETHYLENE	1104_1541		METHANOL	1,4-DIOXANE	1101_1421		WATER	PHENOL	1921_1181
	1-PROPANOL	TRICHOLOROETHYLENE	1103_1541		METHANOL	ETHYL ACETATE	1101_1313		WATER	2-BUTOXYETHANOL	1921_2862
	1-PROPANOL	CHLOROFORM	1521_1103		METHANOL	METHYL tert-BUTYL ETHER	1101_1405		METHANOL	WATER	1101_1921
	ETHYL FORMATE	CHLOROFORM	1302_1521		METHANOL	DIISOPROPYL ETHER	1101_1403		METHANOL	ETHANOL	1101_1102
	1-BUTANOL	CHLOROFORM	1521_1105		METHANOL	n-BUTYL ACETATE	1101_1315		METHANOL	1-PROPANOL	1101_1103
	1-BUTANOL	TRICHLOROETHYLENE	1541_1105		ACETONITRILE	1,4-DIOXANE	1772_1421		METHANOL	1-BUTANOL	1101_1105
	2-BUTANOL	TRICHLOROETHYLENE	1107_1541		ETHANOL	CARBON DIOXIDE	909_1102		METHANOL	3-METHYL-1-BUTANOL	1101_1123
	2-METHOXYETHANOL	TRICHLOROETHYLENE	1541_2860		ETHANOL	ACETONE	1102_1051		ETHANOL	WATER	1102_1921
	n-PROPYL FORMATE	1,1,2,2-TETRACHLOROETHANE	1303_1529		ETHANOL	METHYL ETHYL KETONE	1102_1052		ETHANOL	ACETIC ACID	1102_1252
					ETHANOL	DIETHYL ETHER	1402_1102		ETHANOL	ETHYL FORMATE	1102_1302
					ETHANOL	ETHYL ACETATE	1102_1313		ETHANOL	3-METHYL-1-BUTANOL	1102_1123
					ETHANOL	METHYL tert-BUTYL ETHER	1102_1405		METHYL FORMATE	METHANOL	1301_1101
					ETHANOL	DI-n-BUTYL ETHER	1102_1404		ISOPROPANOL	WATER	1104_1921
					ISOPROPANOL	DIISOPROPYL ETHER	1104_1403		2-METHYL-2-PROPANOL	1-BUTANOL	1108_1105
					DIETHYLAMINE	ETHYL ACETATE	1710_1313		NITROMETHANE	1-BUTANOL	1760_1105
					DIETHYLAMINE	TRIETHYLAMINE	1710_1706		ETHYL FORMATE	WATER	1302_1921
					2-METHYL-1-PROPANOL	CARBON DIOXIDE	909_1106
					2-METHYL-2-PROPANOL	METHYL tert-BUTYL ETHER	1405_1108
					1-PENTANOL	CARBON DIOXIDE	909_1109

## Sheet: 1101_1102
Name	METHANOL		ETHANOL
CAS	67-56-1		64-17-5
Critical temperature / K	512.5		514
Critical pressure / bar	80.84		61.37
Acentric factor	0.566		0.644
	Source: DIPPR May 2017
Phase equilibrium data
Isothermal phase equilibrium data
Kooner, Zs - Fenby, Dv, Vapour pressure study of the deuterium exchange reaction in methanol-ethanol systems: equilibrium constant determination, Australian Journal of Chemistry. 33 (1980)
https://doi.org/10.1071/CH9801943
T / K =	298.15				Chart (double-click image to zoom in)
P / bar	x₁	y₁
0.0823	0.0431	0.086
0.088419	0.1129	0.2112
0.10131	0.2564	0.423
0.10629	0.311	0.4903
0.11316	0.3879	0.5752
0.11556	0.4135	0.6011
0.12204	0.4843	0.6678
0.1286	0.5563	0.7288
0.12938	0.5654	0.736
0.13451	0.6206	0.7782
0.13658	0.6437	0.7949
0.14442	0.7296	0.8528
0.15365	0.8303	0.9131
0.16604	0.9656	0.9836
Hall, D.J. - Mash, C.J. - Pemberton, R.C., Vapor liquid equilibriums for the systems water-​methanol, water-​ethanol, methanol-​ethanol, and water-​methanol-​ethanol at 298.15 K determined by a rapid transpiration method (1979) 1-13.
T / K =	298.15				Chart (double-click image to zoom in)
P / bar	x₁	y₁
0.085646	0.0841	0.161
0.090459	0.1353	0.247
0.095552	0.1902	0.331
0.10418	0.2919	0.467
0.11036	0.3585	0.543
0.11764	0.4414	0.628
0.12639	0.5372	0.715
0.13558	0.6392	0.792
0.14582	0.7489	0.865
0.15484	0.8535	0.928
0.16123	0.9165	0.961
Oh, Seung-Kyo - Campbell, Scott W., Total Pressure Measurements for Copper(II) Chloride + Methanol + Ethanol at 303.15 K, Journal of Chemical & Engineering Data. 40 (1995) 504-508.
https://doi.org/10.1021/je00018a033
T / K =	373.15				Chart (double-click image to zoom in)
P / bar	x₁	y₁
2.465	0.161	0.225
2.782	0.428	0.529
3.016	0.591	0.691
3.318	0.828	0.878
3.469	0.948	0.967
Butcher, K. L. - Robinson, W. I., An apparatus for determining high-pressure liquid-vapour equilibrium data. I. The methanol-ethanol system, Journal of Applied Chemistry. 16 (2007) 289-292.
https://doi.org/10.1002/jctb.5010161003
T / K =	373.15				Chart (double-click image to zoom in)
P / bar	x₁	y₁
2.3304	0.062	0.089
2.4476	0.15	0.213
2.5097	0.213	0.288
2.5924	0.282	0.37
2.7165	0.386	0.486
2.8751	0.492	0.597
2.9992	0.588	0.686
3.1026	0.678	0.764
3.3302	0.838	0.889
3.4474	0.941	0.961
Butcher, K. L. - Robinson, W. I., An apparatus for determining high-pressure liquid-vapour equilibrium data. I. The methanol-ethanol system, Journal of Applied Chemistry. 16 (2007) 289-292.
https://doi.org/10.1002/jctb.5010161003
T / K =	393.15				Chart (double-click image to zoom in)
P / bar	x₁	y₁
4.3851	0.061	0.082
4.5574	0.15	0.2
4.6609	0.212	0.277
4.8056	0.282	0.36
4.9987	0.386	0.473
5.2262	0.491	0.582
5.44	0.589	0.675
5.6192	0.678	0.753
5.9709	0.838	0.882
6.2053	0.942	0.959
Butcher, K. L. - Robinson, W. I., An apparatus for determining high-pressure liquid-vapour equilibrium data. I. The methanol-ethanol system, Journal of Applied Chemistry. 16 (2007) 289-292.
https://doi.org/10.1002/jctb.5010161003
T / K =	433.15				Chart (double-click image to zoom in)
P / bar	x₁	y₁
12.755	0.06	0.075
13.135	0.149	0.185
13.376	0.208	0.253
13.686	0.281	0.339
14.169	0.375	0.441
14.72	0.487	0.556
15.237	0.588	0.652
15.686	0.673	0.728
16.513	0.836	0.867
17.064	0.94	0.951
Isobaric phase equilibrium data
Arce, Alberto - Martı́nez-Ageitos, José - Rodil, Eva - Soto, Ana, Measurement and prediction of isobaric vapour–liquid equilibrium data of the system ethanol+methanol+2-methoxy-2-methylpropane, Fluid Phase Equilibria. 146 (1998) 139-153.
https://doi.org/10.1016/S0378-3812(98)00227-1
P / bar =	1.0132				Chart (double-click image to zoom in)
T / K	x₁	y₁
350.71	0.0418	0.0673
349.88	0.0923	0.1446
348.98	0.1564	0.2326
348.21	0.2026	0.2911
347.57	0.251	0.3544
346.78	0.2981	0.4089
346.09	0.344	0.4617
345.4	0.392	0.516
344.65	0.4453	0.5716
343.96	0.4938	0.6193
343.21	0.5501	0.6767
342.43	0.6075	0.7288
341.86	0.6512	0.7683
341.19	0.7072	0.8089
340.66	0.742	0.8358
340.05	0.7964	0.8735
339.27	0.8619	0.9162
338.78	0.9007	0.9378
338.22	0.9421	0.965
337.83	0.9793	0.9832
Property change of mixing data
Enthalpy of mixing
Pflug, H. D. - Pope, A. E. - Benson, G. C., Heats of mixing of normal alcohols at 25.deg., Journal of Chemical & Engineering Data. 13 (1968) 408-410.
https://doi.org/10.1021/je60038a032
T / K =	298.15				Chart (double-click image to zoom in)
P / bar =	UNKNOWN (1.0132)
hᴹ / J.mol⁻¹	x₁
0.9	0.0734
1.7	0.146
2.5	0.2348
3.2	0.3167
3.9	0.3974
4.4	0.4712
4.6	0.5394
4.7	0.6002
4.6	0.6519
4.4	0.6965
3.5	0.7998
2.7	0.8535
1.9	0.9049
1.2	0.9465
0.6	0.9756
Trampe, D. Mark - Eckert, Charles A., Calorimetric measurement of partial molar excess enthalpies at infinite dilution, Journal of Chemical & Engineering Data. 36 (1991) 112-118.
https://doi.org/10.1021/je00001a033
T / K =	298.15				Chart (double-click image to zoom in)
P / bar =	UNKNOWN (1.0132)
hᴹ / J.mol⁻¹	x₁
2.699	0.8933
2.427	0.9057
2.158	0.918
1.892	0.9301
1.565	0.9421
1.257	0.9539
0.951	0.9656
0.632	0.9772
0.302	0.9887
Heat capacity of mixing
Ogawa, Hideo - Murakami, Sachio, Excess volumes, isentropic compressions, and isobaric heat capacities for methanol mixed with other alkanols at 25°C, Journal of Solution Chemistry. 16 (1987) 315-326.
https://doi.org/10.1007/BF00646123
T / K =	298.15				Chart (double-click image to zoom in)
P / bar =	UNKNOWN (1.0132)
cᴘᴹ / J.mol⁻¹.K⁻¹	x₁
-0.14	0.1
-0.261	0.2
-0.316	0.3
-0.346	0.4
-0.343	0.5
-0.312	0.6
-0.253	0.7
-0.195	0.7995
-0.155	0.85
-0.113	0.9
-0.068	0.95
Fang, Wen-jun - Yu, Qing-sen - Lin, Rui-sen - Zong, Han-xing, Vapor heat capacities of some polar–polar binary systems, Thermochimica Acta. 352-353 (2000) 19-23.
https://doi.org/10.1016/S0040-6031(99)00431-1
T / K =	402.2				Chart (double-click image to zoom in)
P / bar =	1.013
cᴘᴹ / J.mol⁻¹.K⁻¹	z₁
2.11	0.2103
2.66	0.3502
2.94	0.4993
2.66	0.6444
1.82	0.798
Fang, Wen-jun - Yu, Qing-sen - Lin, Rui-sen - Zong, Han-xing, Vapor heat capacities of some polar–polar binary systems, Thermochimica Acta. 352-353 (2000) 19-23.
https://doi.org/10.1016/S0040-6031(99)00431-1
T / K =	441.3				Chart (double-click image to zoom in)
P / bar =	1.013
cᴘᴹ / J.mol⁻¹.K⁻¹	z₁
1.8	0.2103
2.48	0.3502
2.72	0.4993
2.49	0.6444
1.74	0.798

## Sheet: 1101_1103
Name	METHANOL		1-PROPANOL
CAS	67-56-1		71-23-8
Critical temperature / K	512.5		536.8
Critical pressure / bar	80.84		51.69
Acentric factor	0.566		0.621
	Source: DIPPR May 2017
Phase equilibrium data
Isothermal phase equilibrium data
Yamamoto, Hideki - Fukase, Koji - Shibata, Junji, Vapor−Liquid Equilibria for Alcohol + Alcohol + Sodium Iodide at 298.15 K, Journal of Chemical & Engineering Data. 41 (1996) 1066-1070.
https://doi.org/10.1021/je9600966
T / K =	298.15				Chart (double-click image to zoom in)
P / bar	x₁	y₁
0.034104	0.042	0.196
0.050996	0.153	0.535
0.072501	0.304	0.731
0.0787	0.351	0.778
0.091606	0.434	0.824
0.1065	0.541	0.886
0.1162	0.605	0.908
0.1321	0.723	0.947
0.1542	0.878	0.98
Berro, C. - Deyrieux, R. - Peneloux, A., An Ebulliometer for Rapid and Precise Determination of the Vapor-Liquid Equilibrium of Solutions. The Binary System Methanol - 1-Propanol at 60.02 °C, J. Chim. Phys. Phys. Chim. Biol. 72 (1975) 1118-1123.
T / K =	333.17				Chart (double-click image to zoom in)
P / bar	x₁	y₁
0.22658	0.0368	0.1391
0.23733	0.0528	0.1916
0.24291	0.0611	0.2172
0.24619	0.0649	0.2308
0.25531	0.0764	0.262
0.26906	0.1007	0.3223
0.29498	0.1393	0.4077
0.32391	0.1842	0.4857
0.34421	0.2151	0.5337
0.37518	0.2625	0.5977
0.41273	0.3206	0.6609
0.45262	0.3806	0.718
0.49393	0.4459	0.7664
0.5325	0.5022	0.8063
0.5639	0.552	0.8342
0.59148	0.597	0.8562
0.61562	0.6338	0.8744
0.6596	0.7034	0.9037
0.67989	0.737	0.9154
0.70838	0.783	0.9332
0.73697	0.8275	0.9485
0.76984	0.8804	0.9661
0.79732	0.9238	0.9785
0.82681	0.9707	0.9923
Isobaric phase equilibrium data
Gultekin, Nurbay, Vapor-liquid equilibria at 1 atm for ternary and quaternary systems composed of acetone, methanol, 2-propanol, and 1-propanol, Journal of Chemical & Engineering Data. 35 (1990) 132-136.
https://doi.org/10.1021/je00060a010
P / bar =	1.0133				Chart (double-click image to zoom in)
T / K	x₁	y₁
365.45	0.092	0.235
362.03	0.18	0.412
357.05	0.28	0.562
355.68	0.32	0.61
353.4	0.38	0.675
351.3	0.459	0.753
347.61	0.581	0.832
347.42	0.583	0.835
344.43	0.68	0.888
342.55	0.764	0.928
341.45	0.822	0.94
340.23	0.862	0.955
Kojima, K. - Tochigi, K. - Seki, H. - Watase, K., Determination of vapor-​liquid equilibriums from boiling point curves, Kagaku Kogaku. 32 (1968) 149-153.
https://doi.org/10.1252/kakoronbunshu1953.32.149
P / bar =	1.0133				Chart (double-click image to zoom in)
T / K	x₁	y₁
367.41	0.05	0.1487
364.61	0.1	0.2785
362.16	0.15	0.3809
359.93	0.2	0.4664
357.82	0.25	0.5408
355.87	0.3	0.6043
354.01	0.35	0.6602
352.34	0.4	0.7069
350.71	0.45	0.7494
349.16	0.5	0.7871
347.73	0.55	0.8196
346.39	0.6	0.8483
345.08	0.65	0.8747
343.88	0.7	0.8975
342.78	0.75	0.9176
341.7	0.8	0.9366
340.64	0.85	0.9545
339.57	0.9	0.9715
338.6	0.95	0.9861
Property change of mixing data
Enthalpy of mixing
Pflug, H. D. - Pope, A. E. - Benson, G. C., Heats of mixing of normal alcohols at 25.deg., Journal of Chemical & Engineering Data. 13 (1968) 408-410.
https://doi.org/10.1021/je60038a032
T / K =	298.15				Chart (double-click image to zoom in)
P / bar =	UNKNOWN (1.0132)
hᴹ / J.mol⁻¹	x₁
7.5	0.0319
21.4	0.0916
39.8	0.1794
56.2	0.2693
69.8	0.3577
78.3	0.4427
83.1	0.5226
83.8	0.5816
84.1	0.5894
82.7	0.6347
82.2	0.6488
78.9	0.6916
78.5	0.6981
73.6	0.7403
72.5	0.7475
63	0.803
51.8	0.8525
39.2	0.897
27.4	0.9319
15	0.9646
5.5	0.9875
Trampe, D. Mark - Eckert, Charles A., Calorimetric measurement of partial molar excess enthalpies at infinite dilution, Journal of Chemical & Engineering Data. 36 (1991) 112-118.
https://doi.org/10.1021/je00001a033
T / K =	298.15				Chart (double-click image to zoom in)
P / bar =	UNKNOWN (1.0132)
hᴹ / J.mol⁻¹	x₁
5.82	0.9869
5.53	0.9874
5.07	0.9886
4.52	0.9897
4.09	0.9909
3.54	0.992
3.05	0.9932
2.54	0.9943
2.01	0.9955
1.51	0.9966
Khurma, Jagjit R. - Fenby, David V., Thermochemical study of deuterium exchange reactions in water-alcohol and alcohol-alcohol systems, The Journal of Physical Chemistry. 83 (1979) 2443-2447.
https://doi.org/10.1021/j100482a004
T / K =	298.15				Chart (double-click image to zoom in)
P / bar =	UNKNOWN (1.0132)
hᴹ / J.mol⁻¹	x₁
45	0.1899
69.7	0.3341
81.8	0.4396
87.3	0.566
84.7	0.6507
71.8	0.7788
50.4	0.8632
29.7	0.9282
Heat capacity of mixing
Ogawa, Hideo - Murakami, Sachio, Excess volumes, isentropic compressions, and isobaric heat capacities for methanol mixed with other alkanols at 25°C, Journal of Solution Chemistry. 16 (1987) 315-326.
https://doi.org/10.1007/BF00646123
T / K =	298.15				Chart (double-click image to zoom in)
P / bar =	UNKNOWN (1.0132)
cᴘᴹ / J.mol⁻¹.K⁻¹	x₁
-0.411	0.0979
-0.718	0.1963
-0.908	0.2952
-0.981	0.3945
-0.967	0.4942
-0.979	0.5944
-0.711	0.6951
-0.609	0.7456
-0.502	0.7963
-0.384	0.847
-0.263	0.8979
-0.135	0.9489
Additional data with unitary variance
Critical point					Chart (double-click image to zoom in)
Wang, Lipu - Han, Kewei - Xia, Shuqian - Ma, Peisheng - Yan, Fangyou, Measurement and correlation of critical properties for binary mixtures and ternary mixtures containing gasoline additives, The Journal of Chemical Thermodynamics. 74 (2014) 161-168.
https://doi.org/10.1016/j.jct.2014.01.025
T / K	P / bar	x₁
515.8	78.85	0.9002
518.8	76.13	0.7626
520.9	73.79	0.6822
522.5	71.41	0.6039
524.7	68.45	0.5009
527.5	65.42	0.4005
530.4	61.98	0.3015
532.2	58.93	0.2016
534.3	55.73	0.1045

## Sheet: 1101_1105
Name	METHANOL		1-BUTANOL
CAS	67-56-1		71-36-3
Critical temperature / K	512.5		563.1
Critical pressure / bar	80.84		44.14
Acentric factor	0.566		0.588
	Source: DIPPR May 2017
Phase equilibrium data
Isothermal phase equilibrium data
Polák, Jiří - Murakami, Sachio - Lam, V. T. - Pflug, H. D. - Benson, G. C., Molar excess enthalpies, volumes, and Gibbs free energies of methanol – isomeric butanol systems at 25 °C, Canadian Journal of Chemistry. 48 (1970) 2457-2465.
https://doi.org/10.1139/v70-417
T / K =	298.15				Chart (double-click image to zoom in)
P / bar	x₁	y₁
0.024545	0.0871	0.6569
0.026065	0.0953	0.68
0.029904	0.12	0.7302
0.032011	0.1295	0.7482
0.03841	0.169	0.801
0.049489	0.234	0.8564
0.054942	0.2654	0.8751
0.061942	0.3072	0.8946
0.063728	0.3173	0.8993
0.069981	0.3557	0.9128
0.071394	0.3628	0.915
0.080167	0.4172	0.931
0.081673	0.4258	0.9329
0.086833	0.4569	0.9396
0.094339	0.5048	0.9487
0.10678	0.5845	0.9612
0.11746	0.6544	0.9702
0.12772	0.7237	0.9772
0.14155	0.8164	0.9855
0.14893	0.866	0.9894
0.15841	0.929	0.9943
Isobaric phase equilibrium data
Arce, Alberto - Martı́nez-Ageitos, José - Rodil, Eva - Soto, Ana, Phase equilibria involved in extractive distillation of 2-methoxy-2-methylpropane+methanol using 1-butanol as entrainer, Fluid Phase Equilibria. 171 (2000) 207-218.
https://doi.org/10.1016/S0378-3812(00)00364-2
P / bar =	1.0132				Chart (double-click image to zoom in)
T / K	x₁	y₁
386.44	0.0271	0.148
384.73	0.0419	0.2139
367	0.2298	0.6604
363.33	0.2785	0.7297
361.05	0.3227	0.7771
357.91	0.3729	0.8199
355.76	0.4282	0.8526
353.06	0.4912	0.8873
349.94	0.565	0.9173
347.06	0.6422	0.9397
345.09	0.7086	0.9553
342.96	0.7819	0.9705
341.42	0.8418	0.9795
340.23	0.8907	0.9854
339.23	0.9333	0.9913
338.26	0.9736	0.9971
Kay, W.B. - Donham, W.E., Liquid-vapour equilibria in the iso-butanol—n-butanol, methanol—n-butanol and diethyl ether—n-butanol systems, Chemical Engineering Science. 4 (1955) 1-16.
https://doi.org/10.1016/0009-2509(55)85001-4
P / bar =	55.158				Chart (double-click image to zoom in)
T / K	x₁	y₁
555.45	0.214	0.214	CRIT
553.15	0.229	0.251
543.15	0.314	0.401
533.15	0.409	0.537
523.15	0.513	0.653
513.15	0.637	0.763
503.15	0.78	0.87
493.15	0.949	0.973
Kay, W.B. - Donham, W.E., Liquid-vapour equilibria in the iso-butanol—n-butanol, methanol—n-butanol and diethyl ether—n-butanol systems, Chemical Engineering Science. 4 (1955) 1-16.
https://doi.org/10.1016/0009-2509(55)85001-4
P / bar =	68.948				Chart (double-click image to zoom in)
T / K	x₁	y₁
540.85	0.54	0.54	CRIT
533.15	0.598	0.657
523.15	0.71	0.779
513.15	0.843	0.891
Property change of mixing data
Enthalpy of mixing
Stokes, R.H, Excess enthalpies of (butan-1-ol + methanol) at 278.15, 298.15, and 318.15 K, The Journal of Chemical Thermodynamics. 20 (1988) 1349-1352.
https://doi.org/10.1016/0021-9614(88)90172-3
T / K =	278.15				Chart (double-click image to zoom in)
P / bar =	UNKNOWN (1.0132)
hᴹ / J.mol⁻¹	x₁
7.4	0.0154
22.7	0.048
46.1	0.0997
72.6	0.1625
94	0.218
111.6	0.2681
125.7	0.3133
137.2	0.3543
146.4	0.3921
156.7	0.4433
165.3	0.5027
169.4	0.554
170.3	0.5976
168.7	0.6314
168.9	0.6354
166.4	0.6593
165.7	0.6691
162.8	0.6876
161.3	0.6988
157.6	0.7165
150.8	0.7457
142.3	0.7749
131.6	0.8049
118.6	0.835
103.3	0.8652
85.1	0.8957
69.8	0.9184
58.8	0.9334
46.7	0.9486
34	0.9638
20.4	0.9789
6.7	0.9933
Battler, John R. - Rowley, Richard L., Excess enthalpies between 293 and 323 K for constituent binaries of ternary mixtures exhibiting partial miscibility, The Journal of Chemical Thermodynamics. 17 (1985) 719-732.
https://doi.org/10.1016/0021-9614(85)90101-6
T / K =	293.15				Chart (double-click image to zoom in)
P / bar =	1.01
hᴹ / J.mol⁻¹	z₁
3.72	0.0441
19.04	0.086
33.55	0.126
45.66	0.1641
58.52	0.2006
106.1	0.3608
135.47	0.4918
152.4	0.6009
147.37	0.6931
131.11	0.7721
105.99	0.8405
73.28	0.9003
36.03	0.9531
Battler, John R. - Rowley, Richard L., Excess enthalpies between 293 and 323 K for constituent binaries of ternary mixtures exhibiting partial miscibility, The Journal of Chemical Thermodynamics. 17 (1985) 719-732.
https://doi.org/10.1016/0021-9614(85)90101-6
T / K =	298.15				Chart (double-click image to zoom in)
P / bar =	1.01
hᴹ / J.mol⁻¹	z₁
3.69	0.0441
18.42	0.086
31.77	0.126
43.85	0.1641
56.74	0.2006
95.76	0.3608
127.83	0.4918
138.29	0.6009
146.86	0.6931
122.61	0.7721
99.61	0.8405
69.69	0.9003
34.51	0.9531
Battler, John R. - Rowley, Richard L., Excess enthalpies between 293 and 323 K for constituent binaries of ternary mixtures exhibiting partial miscibility, The Journal of Chemical Thermodynamics. 17 (1985) 719-732.
https://doi.org/10.1016/0021-9614(85)90101-6
T / K =	303.15				Chart (double-click image to zoom in)
P / bar =	1.01
hᴹ / J.mol⁻¹	z₁
3.39	0.0441
15.21	0.086
27.05	0.126
38.83	0.1641
48.65	0.2006
90.82	0.3608
117.23	0.4918
130.22	0.6009
129.69	0.6931
117.17	0.7721
95.06	0.8405
66.57	0.9003
32.68	0.9531
Stokes, R.H, Excess enthalpies of (butan-1-ol + methanol) at 278.15, 298.15, and 318.15 K, The Journal of Chemical Thermodynamics. 20 (1988) 1349-1352.
https://doi.org/10.1016/0021-9614(88)90172-3
T / K =	318.15				Chart (double-click image to zoom in)
P / bar =	UNKNOWN (1.0132)
hᴹ / J.mol⁻¹	x₁
4.7	0.0206
13.7	0.0586
22	0.093
34.1	0.1425
49.1	0.2027
62.2	0.2556
76.3	0.3148
90.1	0.3774
102.5	0.441
112.3	0.5032
118.1	0.5557
121	0.601
121.6	0.6401
122.9	0.6457
120.6	0.6741
122.1	0.6756
120.2	0.7055
116.8	0.7359
111.9	0.7665
105.1	0.7972
96.2	0.8286
85.2	0.8593
73.7	0.8859
61.8	0.9096
50.6	0.9294
40.7	0.9453
30	0.9611
18.6	0.9768
6.3	0.9924
Battler, John R. - Rowley, Richard L., Excess enthalpies between 293 and 323 K for constituent binaries of ternary mixtures exhibiting partial miscibility, The Journal of Chemical Thermodynamics. 17 (1985) 719-732.
https://doi.org/10.1016/0021-9614(85)90101-6
T / K =	323.15				Chart (double-click image to zoom in)
P / bar =	1.01
hᴹ / J.mol⁻¹	z₁
2.37	0.0441
8.23	0.086
15.38	0.126
22.17	0.1641
29.5	0.2006
61.26	0.3608
88.7	0.4918
104.11	0.6009
108.37	0.6931
99.49	0.7721
82.39	0.8405
58.45	0.9003
28.75	0.9531
Heat capacity of mixing
Ogawa, Hideo - Murakami, Sachio, Excess volumes, isentropic compressions, and isobaric heat capacities for methanol mixed with other alkanols at 25°C, Journal of Solution Chemistry. 16 (1987) 315-326.
https://doi.org/10.1007/BF00646123
T / K =	298.15				Chart (double-click image to zoom in)
P / bar =	UNKNOWN (1.0132)
cᴘᴹ / J.mol⁻¹.K⁻¹	x₁
-0.604	0.1
-1.04	0.2001
-1.319	0.3001
-1.428	0.4001
-1.409	0.5001
-1.276	0.6001
-1.039	0.7001
-0.889	0.7501
-0.728	0.8001
-0.559	0.85
-0.377	0.9
-0.191	0.95
Additional data with unitary variance
Critical point					Chart (double-click image to zoom in)
Kay, W.B. - Donham, W.E., Liquid-vapour equilibria in the iso-butanol—n-butanol, methanol—n-butanol and diethyl ether—n-butanol systems, Chemical Engineering Science. 4 (1955) 1-16.
https://doi.org/10.1016/0009-2509(55)85001-4
T / K	P / bar	x₁
522.99	78.125	0.8334
531.37	74.291	0.6993
540.42	68.127	0.5307
554.11	55.082	0.2381

## Sheet: 1101_1123
Name	METHANOL		3-METHYL-1-BUTANOL
CAS	67-56-1		123-51-3
Critical temperature / K	512.5		577.2
Critical pressure / bar	80.84		39.3
Acentric factor	0.566		0.59
	Source: DIPPR May 2017
Phase equilibrium data
Isothermal phase equilibrium data
Kim, J.S. - Lee, J.M., The prediction of vapor-​liquid equilibrium data for methanol/3-​methyl-​1-​butanol system at constant temperature, Kongop Hwahak. 16 (2005) 749-754.
T / K =	323.15				Chart (double-click image to zoom in)
P / bar	x₁	y₁
0.10199	0.118	0.799
0.13319	0.164	0.852
0.14719	0.186	0.868
0.16972	0.224	0.891
0.18678	0.253	0.905
0.20998	0.292	0.921
0.23958	0.342	0.934
0.25398	0.366	0.94
0.28104	0.414	0.95
0.31584	0.484	0.961
0.33224	0.513	0.964
0.37037	0.59	0.972
0.3985	0.643	0.977
0.40543	0.657	0.978
0.4341	0.715	0.983
0.4569	0.765	0.986
0.49009	0.838	0.991
0.52782	0.892	0.994
Kim, J.S. - Lee, J.M., The prediction of vapor-​liquid equilibrium data for methanol/3-​methyl-​1-​butanol system at constant temperature, Kongop Hwahak. 16 (2005) 749-754.
T / K =	328.15				Chart (double-click image to zoom in)
P / bar	x₁	y₁
0.12199	0.106	0.76
0.15372	0.148	0.82
0.22625	0.245	0.891
0.24745	0.274	0.904
0.27291	0.308	0.917
0.33211	0.391	0.939
0.35304	0.423	0.944
0.3721	0.452	0.95
0.4057	0.504	0.958
0.4245	0.534	0.962
0.45663	0.581	0.967
0.47503	0.612	0.971
0.48849	0.634	0.973
0.51942	0.687	0.978
0.54622	0.732	0.982
0.57129	0.775	0.985
0.60888	0.84	0.99
0.63235	0.885	0.993
0.65821	0.932	0.996
Udovenko, V.V. - Frid, Ts.B., Heats of vaporization of binary mixtures. II, Zh. Fiz. Khim. 22 (1948) 1135-1145.
T / K =	333.15				Chart (double-click image to zoom in)
P / bar	x₁	y₁
0.14199	0.1	0.729
0.23598	0.2	0.854
0.32451	0.3	0.905
0.40677	0.4	0.935
0.55849	0.6	0.967
0.62902	0.7	0.978
0.70114	0.8	0.986
0.76527	0.9	0.994
Kim, J.S. - Lee, J.M., The prediction of vapor-​liquid equilibrium data for methanol/3-​methyl-​1-​butanol system at constant temperature, Kongop Hwahak. 16 (2005) 749-754.
T / K =	333.15				Chart (double-click image to zoom in)
P / bar	x₁	y₁
0.16679	0.127	0.775
0.21012	0.174	0.833
0.22691	0.193	0.849
0.24691	0.215	0.864
0.30198	0.277	0.897
0.3513	0.334	0.916
0.3641	0.35	0.921
0.38477	0.375	0.928
0.42463	0.424	0.939
0.46543	0.474	0.949
0.49369	0.512	0.955
0.52769	0.558	0.961
0.54436	0.583	0.964
0.58755	0.642	0.972
0.60995	0.674	0.975
0.65115	0.731	0.98
0.67821	0.768	0.983
0.72714	0.818	0.987
0.73781	0.858	0.99
0.7798	0.925	0.995
Kim, J.S. - Lee, J.M., The prediction of vapor-​liquid equilibrium data for methanol/3-​methyl-​1-​butanol system at constant temperature, Kongop Hwahak. 16 (2005) 749-754.
T / K =	338.15				Chart (double-click image to zoom in)
P / bar	x₁	y₁
0.19132	0.107	0.725
0.21892	0.132	0.765
0.27904	0.186	0.828
0.32197	0.224	0.859
0.36477	0.261	0.88
0.45036	0.342	0.911
0.48169	0.374	0.92
0.53116	0.425	0.933
0.55635	0.45	0.939
0.61688	0.513	0.951
0.68194	0.586	0.961
0.72167	0.631	0.967
0.75287	0.667	0.971
0.77607	0.693	0.974
0.80993	0.732	0.978
0.8274	0.753	0.98
0.88966	0.83	0.987
0.93939	0.877	0.991
0.97152	0.93	0.995
Udovenko, V.V. - Frid, Ts.B., Heats of vaporization of binary mixtures. II, Zh. Fiz. Khim. 22 (1948) 1135-1145.
T / K =	343.15				Chart (double-click image to zoom in)
P / bar	x₁	y₁
0.22065	0.1	0.681
0.36064	0.2	0.828
0.49183	0.3	0.888
0.61448	0.4	0.922
0.72834	0.5	0.944
0.8294	0.6	0.96
0.93512	0.7	0.973
1.0386	0.8	0.984
1.1347	0.9	0.992
Kim, J.S. - Lee, J.M., The prediction of vapor-​liquid equilibrium data for methanol/3-​methyl-​1-​butanol system at constant temperature, Kongop Hwahak. 16 (2005) 749-754.
T / K =	343.15				Chart (double-click image to zoom in)
P / bar	x₁	y₁
0.22598	0.104	0.701
0.28704	0.147	0.767
0.32957	0.179	0.808
0.40503	0.235	0.855
0.46156	0.277	0.878
0.46783	0.292	0.884
0.51822	0.321	0.896
0.54036	0.34	0.903
0.59928	0.378	0.915
0.65008	0.433	0.93
0.68834	0.465	0.937
0.74154	0.513	0.947
0.7686	0.541	0.951
0.80447	0.575	0.956
0.85273	0.622	0.963
0.92872	0.695	0.973
0.95899	0.725	0.976
1.0157	0.78	0.981
1.0728	0.837	0.986
1.148	0.914	0.993
Isobaric phase equilibrium data
Resa, JoséM - González, Cristina - Moradillo, Blanca - Ruiz, Aitor, Isobaric vapor-liquid equilibria of 3-methyl-1-butanol with methanol and vinyl acetate at 101.3 kPa, Fluid Phase Equilibria. 132 (1997) 205-213.
https://doi.org/10.1016/S0378-3812(97)00027-7
P / bar =	1.013				Chart (double-click image to zoom in)
T / K	x₁	y₁
384.5	0.104	0.542
379	0.138	0.646
373.2	0.184	0.726
368.3	0.227	0.814
364.8	0.285	0.851
362.5	0.32	0.873
361.4	0.335	0.877
359.6	0.361	0.892
356.4	0.409	0.92
353.5	0.47	0.938
352.5	0.49	0.944
347.8	0.606	0.96
343.8	0.71	0.98
341.7	0.808	0.987
339.1	0.917	0.996

## Sheet: 1101_1921
Name	METHANOL		WATER
CAS	67-56-1		7732-18-5
Critical temperature / K	512.5		647.096
Critical pressure / bar	80.84		220.64
Acentric factor	0.566		0.345
	Source: DIPPR May 2017
Phase equilibrium data
Isothermal phase equilibrium data
Jinyan Fu - Kun Wang - Ying Hu, Studies on the Vapor-Liquid Equilibrium and Vapor-Liquid-Liquid Equilibrium for a Methanol-Methyl Methacrylate-WaterTernary System (I) Three Different Binary Systems, Huagong Xuebao. 39 (1988) 64-76.
T / K =	298.15				Chart (double-click image to zoom in)
P / bar	x₁	y₁
0.0565	0.1029	0.5002
0.0757	0.2021	0.6533
0.0916	0.3032	0.737
0.1033	0.4028	0.7927
0.1137	0.5019	0.836
0.1252	0.6096	0.876
0.1357	0.7073	0.9089
0.1457	0.8016	0.939
0.1575	0.9	0.9695
Maximo, Guilherme J. - Meirelles, Antonio J.A. - Batista, Eduardo A.C., Boiling point of aqueous d-glucose and d-fructose solutions: Experimental determination and modeling with group-contribution method, Fluid Phase Equilibria. 299 (2010) 32-41.
https://doi.org/10.1016/j.fluid.2010.08.018
T / K =	298.15				Chart (double-click image to zoom in)
P / bar	x₁	y₁
0.058262	0.1	0.507
0.075994	0.2	0.654
0.089993	0.3	0.733
0.10199	0.4	0.789
0.11332	0.5	0.833
0.12426	0.6	0.871
0.13519	0.7	0.906
0.14612	0.8	0.939
0.15745	0.9	0.97
Jinyan Fu - Kun Wang - Ying Hu, Studies on the Vapor-Liquid Equilibrium and Vapor-Liquid-Liquid Equilibrium for a Methanol-Methyl Methacrylate-WaterTernary System (I) Three Different Binary Systems, Huagong Xuebao. 39 (1988) 64-76.
T / K =	308.15				Chart (double-click image to zoom in)
P / bar	x₁	y₁
0.0981	0.1029	0.4872
0.1291	0.2021	0.6394
0.1545	0.3032	0.7234
0.1736	0.4028	0.7801
0.1903	0.5019	0.8247
0.2084	0.6096	0.8666
0.2253	0.7073	0.9014
0.2416	0.8016	0.9336
0.2601	0.9	0.9666
McGlashan, M. L. - Williamson, A. G., Isothermal liquid-vapor equilibriums for system methanol-water, Journal of Chemical & Engineering Data. 21 (1976) 196-199.
https://doi.org/10.1021/je60069a019
T / K =	308.15				Chart (double-click image to zoom in)
P / bar	x₁	y₁
0.073327	0.0408	0.249
0.10872	0.1387	0.5274
0.14011	0.2488	0.6738
0.16397	0.3603	0.7559
0.18347	0.4694	0.8084
0.2058	0.6012	0.8611
0.22681	0.7239	0.9071
0.23981	0.7951	0.9316
0.25758	0.888	0.9636
0.25859	0.9005	0.9683
0.26805	0.9406	0.9815
Jinyan Fu - Kun Wang - Ying Hu, Studies on the Vapor-Liquid Equilibrium and Vapor-Liquid-Liquid Equilibrium for a Methanol-Methyl Methacrylate-WaterTernary System (I) Three Different Binary Systems, Huagong Xuebao. 39 (1988) 64-76.
T / K =	318.15				Chart (double-click image to zoom in)
P / bar	x₁	y₁
0.1639	0.1029	0.475
0.2125	0.2021	0.626
0.2516	0.3032	0.7103
0.2813	0.4028	0.7679
0.3073	0.5019	0.8137
0.3354	0.6096	0.8573
0.3618	0.7073	0.894
0.3868	0.8016	0.9283
0.4148	0.9	0.9638
Yao, Jia - Li, Haoran - Han, Shijun, Vapor–liquid equilibrium data for methanol–water–NaCl at 45°C, Fluid Phase Equilibria. 162 (1999) 253-260.
https://doi.org/10.1016/S0378-3812(99)00204-6
T / K =	318.15				Chart (double-click image to zoom in)
P / bar	x₁	y₁
0.14769	0.0753	0.3986
0.18185	0.1358	0.5384
0.21889	0.2171	0.6466
0.24758	0.2926	0.7082
0.27671	0.3805	0.7641
0.30066	0.4731	0.8073
0.32579	0.5563	0.8397
0.35176	0.6507	0.8743
0.38142	0.7604	0.9136
0.40953	0.8739	0.9538
0.42782	0.9354	0.9773
Kurihara, Kiyofumi - Minoura, Tsuyoshi - Takeda, Kouichi - Kojima, Kazuo, Isothermal Vapor-Liquid Equilibria for Methanol + Ethanol + Water, Methanol + Water, and Ethanol + Water, Journal of Chemical & Engineering Data. 40 (1995) 679-684.
https://doi.org/10.1021/je00019a033
T / K =	323.15				Chart (double-click image to zoom in)
P / bar	x₁	y₁
0.29119	0.247	0.671
0.3062	0.2842	0.7029
0.31135	0.294	0.7109
0.32791	0.3338	0.7373
0.35321	0.4028	0.7772
0.36276	0.4316	0.7873
0.38085	0.4872	0.81
0.39341	0.5314	0.8254
0.40159	0.5513	0.8326
0.40613	0.5688	0.841
0.42049	0.6145	0.8569
0.44916	0.6989	0.889
0.45943	0.729	0.8991
0.47333	0.773	0.916
Dulitskaya, K.A., Vapor pressure of binary systems. I, Zh. Obshch. Khim. 15 (1945) 9-21.
T / K =	323.15				Chart (double-click image to zoom in)
P / bar	x₁	y₁
0.19065	0.0873	0.3783
0.26198	0.19	0.5883
0.32597	0.3417	0.7076
0.3813	0.4943	0.7807
0.44396	0.6919	0.8655
0.49729	0.8492	0.9349
Jinyan Fu - Kun Wang - Ying Hu, Studies on the Vapor-Liquid Equilibrium and Vapor-Liquid-Liquid Equilibrium for a Methanol-Methyl Methacrylate-WaterTernary System (I) Three Different Binary Systems, Huagong Xuebao. 39 (1988) 64-76.
T / K =	328.15				Chart (double-click image to zoom in)
P / bar	x₁	y₁
0.2652	0.1029	0.4635
0.3398	0.2021	0.6131
0.3977	0.3032	0.6976
0.4429	0.4028	0.7559
0.4822	0.5019	0.8029
0.524	0.6096	0.8481
0.564	0.7073	0.8867
0.6018	0.8016	0.9231
0.6429	0.9	0.961
Kurihara, Kiyofumi - Minoura, Tsuyoshi - Takeda, Kouichi - Kojima, Kazuo, Isothermal Vapor-Liquid Equilibria for Methanol + Ethanol + Water, Methanol + Water, and Ethanol + Water, Journal of Chemical & Engineering Data. 40 (1995) 679-684.
https://doi.org/10.1021/je00019a033
T / K =	328.15				Chart (double-click image to zoom in)
P / bar	x₁	y₁
0.30709	0.1587	0.566
0.33368	0.198	0.6154
0.39038	0.2961	0.7019
0.40215	0.3171	0.7182
0.40835	0.3339	0.728
0.42143	0.361	0.7432
0.4276	0.3733	0.7504
0.44236	0.4137	0.7693
0.45184	0.4346	0.7799
0.46743	0.4753	0.7947
0.48181	0.5078	0.8079
0.505	0.5669	0.8315
0.511	0.5897	0.8401
0.51974	0.603	0.8495
0.52226	0.6091	0.8502
0.52664	0.6217	0.8557
0.54245	0.66	0.8709
0.54955	0.6781	0.877
0.55979	0.7032	0.8866
0.59208	0.7808	0.9183
Jinyan Fu - Kun Wang - Ying Hu, Studies on the Vapor-Liquid Equilibrium and Vapor-Liquid-Liquid Equilibrium for a Methanol-Methyl Methacrylate-WaterTernary System (I) Three Different Binary Systems, Huagong Xuebao. 39 (1988) 64-76.
T / K =	333.15				Chart (double-click image to zoom in)
P / bar	x₁	y₁
0.3337	0.1029	0.4579
0.4256	0.2021	0.6069
0.4956	0.3032	0.6914
0.5498	0.4028	0.7501
0.5977	0.5019	0.7976
0.6495	0.6096	0.8436
0.6959	0.7073	0.8831
0.7434	0.8016	0.9205
0.7947	0.9	0.9596
McGlashan, M. L. - Williamson, A. G., Isothermal liquid-vapor equilibriums for system methanol-water, Journal of Chemical & Engineering Data. 21 (1976) 196-199.
https://doi.org/10.1021/je60069a019
T / K =	338.15				Chart (double-click image to zoom in)
P / bar	x₁	y₁
0.39026	0.0854	0.3926
0.39202	0.0874	0.4018
0.44958	0.1328	0.4963
0.50301	0.1816	0.5718
0.57275	0.2586	0.6512
0.72638	0.492	0.7842
0.77843	0.5815	0.8242
0.84621	0.7043	0.8747
0.90711	0.8028	0.918
0.96961	0.903	0.9605
Nagatani, M. - Fujino, K., Measurement of isothermal vapor-​liquid equilibria for methanol-​water system, Fukuoka Daigaku Kogaku Shuho. 64 (2000) 147-152.
T / K =	338.15				Chart (double-click image to zoom in)
P / bar	x₁	y₁
0.32827	0.0481	0.2804
0.38193	0.0827	0.3848
0.3995	0.097	0.4323
0.40121	0.1001	0.4352
0.41187	0.1073	0.4499
0.41255	0.1089	0.4589
0.41314	0.109	0.4492
0.45308	0.1388	0.5118
0.45958	0.145	0.5254
0.47684	0.1623	0.5515
0.47927	0.1644	0.5545
0.4914	0.1732	0.5676
0.49709	0.1814	0.5767
0.50321	0.1857	0.5799
0.50516	0.19	0.5857
0.56555	0.2551	0.6512
0.56935	0.26	0.6537
0.58241	0.2782	0.6672
0.58653	0.283	0.6709
0.63699	0.3451	0.7098
0.63701	0.3542	0.7166
0.64128	0.362	0.7122
0.64449	0.3667	0.7244
0.69682	0.4483	0.764
0.69917	0.4527	0.7644
0.70213	0.4594	0.7694
0.70502	0.4624	0.7709
0.76594	0.5677	0.8173
0.77286	0.5781	0.8216
0.82161	0.6648	0.8592
0.82911	0.679	0.8656
0.90025	0.7924	0.91
0.8985	0.7937	0.9145
0.9033	0.7995	0.9171
0.91009	0.8115	0.922
Bao, Z. - Liu, M. - Yang, J. - Wang, N., Measurement and Correlation of Moderate Pressure Vapor-Liquid Equilibrium Data for Methanol - Water Binary System, Huagong Xuebao. 46 (1995) 230-233.
T / K =	403.15				Chart (double-click image to zoom in)
P / bar	x₁	y₁
3.92	0.099	0.352
4.72	0.196	0.506
5.55	0.346	0.637
6.31	0.492	0.723
6.82	0.643	0.797
7.48	0.793	0.881
7.9	0.891	0.938
8.15	0.942	0.967
Schröder, W., Messungen von Siedegleichgewichten bei Überdruck: Messungen von Siedegleichgewichten bei Überdruck, Chemie Ingenieur Technik. 30 (1958) 523-525.
https://doi.org/10.1002/cite.330300809
T / K =	413.15				Chart (double-click image to zoom in)
P / bar	x₁	y₁
5.0956	0.096	0.344
6.7994	0.275	0.579
7.8794	0.444	0.702
8.8259	0.595	0.786
9.9325	0.791	0.88
10.586	0.946	0.962
Pryanikova, R.O. - Efremova, G.D., Liquid-​vapor equilibrium and volume behavior of the methanol-​water system at high temperatures and pressures, Fiz. Khim. Rastvorov. (1972) 228-233.
T / K =	523.15				Chart (double-click image to zoom in)
P / bar	x₁	y₁
40.53	0.01	0.03
45.596	0.07	0.227
50.663	0.125	0.35
55.729	0.18	0.45
60.795	0.26	0.555
65.861	0.335	0.655
70.928	0.45	0.735
Pryanikova, R.O. - Efremova, G.D., Liquid-​vapor equilibrium and volume behavior of the methanol-​water system at high temperatures and pressures, Fiz. Khim. Rastvorov. (1972) 228-233.
T / K =	548.15				Chart (double-click image to zoom in)
P / bar	x₁	y₁
60.795	0.02	0.075
65.861	0.055	0.2
70.928	0.1	0.295
75.994	0.145	0.38
81.06	0.195	0.455
86.126	0.24	0.525
Isobaric phase equilibrium data
Yang, Changsheng - Sun, Feizhong - Ma, Shengyong - Yin, Xia - Zeng, Hao, Organic Salt Effect on Vapor–Liquid Equilibrium of the Methanol + Water System at Subatmospheric Pressure, Journal of Chemical & Engineering Data. 57 (2012) 2696-2701.
https://doi.org/10.1021/je300613v
P / bar =	0.6662				Chart (double-click image to zoom in)
T / K	x₁	y₁
358.06	0.02	0.139
355.88	0.039	0.235
352.16	0.075	0.366
346.11	0.16	0.538
342.54	0.246	0.638
341.06	0.289	0.674
339.77	0.332	0.706
338.16	0.393	0.744
336.93	0.449	0.769
335.03	0.536	0.816
333.76	0.62	0.849
331.93	0.707	0.888
330.31	0.819	0.935
328.2	0.948	0.983
Lesteva, T.M. - Ogorodnikov, S.K. - Kazakova, S.V., Liquid-​vapor equilibrium in the trimethylcarbinol-​methanol-​water system at a pressure of 760 mm. V, J. Appl. Chem. USSR. 43 (1970) 1582-1586.
P / bar =	1.0133				Chart (double-click image to zoom in)
T / K	x₁	y₁
360.55	0.1	0.386
354.95	0.2	0.557
351.05	0.3	0.661
348.35	0.4	0.726
346.25	0.5	0.775
344.45	0.6	0.823
342.95	0.7	0.867
341.15	0.8	0.913
339.45	0.9	0.956
Hirata, M. - Suda, S., Vapor-​liquid equilibrium under pressurized conditions; experimental apparatus and methanol-​water system, Kagaku Kogaku. 31 (1967) 759-766.
https://doi.org/10.1252/kakoronbunshu1953.31.759
P / bar =	8.106				Chart (double-click image to zoom in)
T / K	x₁	y₁
438.25	0.03	0.143
434.25	0.058	0.232
429.35	0.106	0.343
425.25	0.154	0.434
421.45	0.23	0.514
418.05	0.309	0.576
415.15	0.391	0.631
411.45	0.518	0.72
408.95	0.618	0.785
406.95	0.716	0.846
404.65	0.84	0.91
404.55	0.85	0.914
Hirata, M. - Suda, S., Vapor-​liquid equilibrium under pressurized conditions; experimental apparatus and methanol-​water system, Kagaku Kogaku. 31 (1967) 759-766.
https://doi.org/10.1252/kakoronbunshu1953.31.759
P / bar =	11.348				Chart (double-click image to zoom in)
T / K	x₁	y₁
451.05	0.038	0.164
447.85	0.067	0.241
443.25	0.104	0.338
438.75	0.171	0.434
434.85	0.24	0.512
431.35	0.329	0.583
427.45	0.443	0.664
425.25	0.511	0.71
421.15	0.67	0.804
420.05	0.717	0.825
417.65	0.845	0.908
Property change of mixing data
Enthalpy of mixing
Bose, E., Remarks on thermochemical statement of Julius Thomsens, Phys. Z. 7 (1906) 503-505.
T / K =	273.15				Chart (double-click image to zoom in)
P / bar =	UNKNOWN (1.0132)
hᴹ / J.mol⁻¹	x₁
-243.63	0.0288
-485.11	0.0588
-636.97	0.0903
-783.47	0.1233
-883.09	0.1579
-948.16	0.1942
-988.2	0.2324
-994.68	0.2727
-988.93	0.3151
-970.28	0.36
-945.07	0.4074
-914.24	0.4576
-870.13	0.5109
-809.79	0.5675
-743.42	0.6279
-658.23	0.6923
-555.15	0.7612
-420.93	0.835
-245.41	0.9144
Cochran, S.W. - Holste, J.C. - Marsh, K.N. - Gammon, B.E. - Hall, K.R., Enthalpies of water + methanol mixtures between 180 K and 320 K, Fluid Phase Equilibria. 88 (1993) 171-181.
https://doi.org/10.1016/0378-3812(93)87110-M
T / K =	288.15				Chart (double-click image to zoom in)
P / bar =	1.0132
hᴹ / J.mol⁻¹	z₁
-26.8	0.0035
-79.8	0.0103
-131.4	0.0171
-181.7	0.024
-230.8	0.0309
-278.1	0.0378
-323.6	0.0447
-367.3	0.0516
-429.2	0.0619
-504.7	0.0756
-572.1	0.0893
-632	0.103
-685.6	0.1168
-731.5	0.1304
-771	0.144
-805.6	0.1575
-834.3	0.171
-858.5	0.1845
-878.9	0.1979
-895.6	0.2113
-908.7	0.2245
-918.7	0.2376
-926.6	0.2508
-932.4	0.2641
-937.6	0.2824
-938.6	0.2939
-938.6	0.306
-937.5	0.3188
-934.6	0.3324
-930.1	0.3467
-924.7	0.3618
-918	0.3776
-909.8	0.3945
-899.8	0.4124
-887.9	0.4314
-874.2	0.4515
-858.4	0.473
-840.4	0.4959
-819.7	0.5205
-795.9	0.5467
-768.8	0.5748
-737.3	0.6052
-701	0.6379
-659.2	0.6733
-609.3	0.7118
-548.7	0.7536
-493.9	0.7876
-452	0.8116
-404.9	0.8367
-351.6	0.863
-290.7	0.8907
-220.8	0.9199
-140.4	0.9507
-49.6	0.9831
Tomaszkiewicz, Iwona - Randzio, Stanisław.L. - Gierycz, Paweł, Excess enthalpy in the methanol-water system at 278.15, 298.15 and 323.15 k under pressures of 0.1, 20 and 39 mpa, Thermochimica Acta. 103 (1986) 281-289.
https://doi.org/10.1016/0040-6031(86)85164-4
T / K =	298.15				Chart (double-click image to zoom in)
P / bar =	390
hᴹ / J.mol⁻¹	z₁
-564	0.098
-795	0.191
-869	0.252
-892	0.339
-849	0.44
-787	0.52
-726	0.604
Cochran, S.W. - Holste, J.C. - Marsh, K.N. - Gammon, B.E. - Hall, K.R., Enthalpies of water + methanol mixtures between 180 K and 320 K, Fluid Phase Equilibria. 88 (1993) 171-181.
https://doi.org/10.1016/0378-3812(93)87110-M
T / K =	318.15				Chart (double-click image to zoom in)
P / bar =	1.0132
hᴹ / J.mol⁻¹	z₁
-13.5	0.0023
-39.8	0.0068
-69.9	0.0121
-107.9	0.0189
-148.3	0.0264
-206.2	0.0377
-278.5	0.0527
-344.3	0.0678
-403.8	0.0828
-457.2	0.0978
-504.6	0.1129
-545.7	0.1278
-581.6	0.1428
-613.2	0.1577
-640.6	0.1727
-663.6	0.1876
-682.6	0.2022
-698.5	0.2169
-711.5	0.2316
-721.8	0.2463
-725.4	0.2553
-729.7	0.2606
-731.1	0.267
-735.8	0.275
-735.8	0.2793
-740.2	0.2893
-739.4	0.2924
-743.2	0.3039
-741.8	0.3062
-744.8	0.3181
-743	0.3208
-745.1	0.3315
-743.1	0.3365
-741.8	0.3532
-739.3	0.3708
-735.5	0.3896
-729.5	0.4097
-721.9	0.4313
-712.2	0.4545
-700.4	0.4794
-686.1	0.5062
-669	0.5352
-649.3	0.5666
-625.6	0.6009
-596.3	0.6382
-560	0.6791
-513.9	0.7241
-454	0.7739
-373.7	0.8293
-293.9	0.8751
-228.6	0.9079
-158.5	0.9395
-95	0.9653
-33.9	0.9882
Hynek, V. - Degrange, S. - Polednicek, M. - Majer, V. - Quint, J. - Grolier, J.P.E., Combined flow-mixing power-compensation calorimeter and vibrating tube densimeter for measurements at superambient condition, J. Solution Chem. 28 (1999) 631-666.
https://doi.org/10.1023/A:1021759810070
T / K =	523.15				Chart (double-click image to zoom in)
P / bar =	200
hᴹ / J.mol⁻¹	z₁
65	0.016
128	0.032
168	0.043
238	0.066
259	0.075
304	0.089
394	0.119
457	0.14
520	0.168
612	0.226
743	0.327
826	0.413
835	0.447
840	0.489
824	0.548
759	0.62
733	0.666
Heat capacity of mixing
Benson, George C. - D'Arcy, Patrick J., Excess isobaric heat capacities of water-n-alcohol mixtures, Journal of Chemical & Engineering Data. 27 (1982) 439-442.
https://doi.org/10.1021/je00030a021
T / K =	288.15				Chart (double-click image to zoom in)
P / bar =	UNKNOWN (1.0132)
cᴘᴹ / J.mol⁻¹.K⁻¹	x₁
1	0.013
1.45	0.0192
1.85	0.025
2.2	0.0303
2.84	0.041
3.27	0.0489
3.37	0.0513
3.87	0.0614
4.17	0.0686
4.31	0.0725
4.6	0.0809
4.9	0.0908
5.14	0.101
5.47	0.1201
5.48	0.1243
5.65	0.1489
5.65	0.1725
5.6	0.1892
5.5	0.2046
5.34	0.2255
5.06	0.2503
4.93	0.2716
4.72	0.2909
4.47	0.3194
4.41	0.3239
4.23	0.3411
4.01	0.3719
3.61	0.4069
3.5	0.431
3.26	0.4629
3.03	0.4862
2.81	0.5235
2.54	0.5455
2.41	0.5731
2.37	0.5847
2.02	0.6304
1.87	0.6474
1.77	0.6698
1.53	0.7007
1.43	0.7253
1.12	0.7658
0.9	0.8001
0.66	0.8375
0.54	0.8531
0.39	0.8843
0.15	0.9366
Benson, George C. - D'Arcy, Patrick J. - Kiyohara, Osamu, Thermodynamics of aqueous mixtures of nonelectrolytes II. Isobaric heat capacities of water-n-alcohol mixtures at 25°C, Journal of Solution Chemistry. 9 (1980) 931-938.
https://doi.org/10.1007/BF00646404
T / K =	298.15				Chart (double-click image to zoom in)
P / bar =	UNKNOWN (1.0132)
cᴘᴹ / J.mol⁻¹.K⁻¹	x₁
0.705	0.0094
1.486	0.0204
2.06	0.029
2.75	0.04
3.21	0.0491
3.38	0.051
3.84	0.0597
4.28	0.069
4.73	0.0794
5.18	0.0912
5.46	0.1008
5.49	0.1018
6.24	0.1312
6.29	0.1449
6.77	0.1852
6.75	0.2014
6.74	0.2017
6.75	0.2334
6.54	0.2744
6.29	0.2989
6.23	0.3053
5.98	0.3362
5.54	0.3824
5.49	0.3949
5.43	0.4001
4.92	0.4565
4.5	0.5054
4.5	0.5069
4.1	0.5533
3.71	0.5981
3.6	0.6049
3.26	0.6483
2.8	0.6967
2.7	0.6967
2.31	0.7475
1.82	0.7972
1.68	0.7986
1.4	0.8467
0.66	0.9011
0.72	0.9077
0.47	0.9375
0.24	0.9582
Ogawa, Hideo - Murakami, Sachio, Excess isobaric heat capacities for water + alkanol mixtures at 298.15 K, Thermochimica Acta. 109 (1986) 145-154.
https://doi.org/10.1016/0040-6031(86)85016-X
T / K =	298.15				Chart (double-click image to zoom in)
P / bar =	UNKNOWN (1.0132)
cᴘᴹ / J.mol⁻¹.K⁻¹	x₁
1.775	0.025
3.305	0.05
4.55	0.075
5.479	0.1
6.093	0.125
6.497	0.1501
6.808	0.2001
6.69	0.2501
6.388	0.3001
6.016	0.3501
5.624	0.4001
5.204	0.4501
4.823	0.5001
4.365	0.5501
3.937	0.6001
3.496	0.6501
3.026	0.7001
2.049	0.8001
1.114	0.9
Benson, George C. - D'Arcy, Patrick J., Excess isobaric heat capacities of water-n-alcohol mixtures, Journal of Chemical & Engineering Data. 27 (1982) 439-442.
https://doi.org/10.1021/je00030a021
T / K =	308.15				Chart (double-click image to zoom in)
P / bar =	UNKNOWN (1.0132)
cᴘᴹ / J.mol⁻¹.K⁻¹	x₁
1.1	0.0155
1.53	0.022
1.83	0.0262
2.23	0.0323
2.29	0.0334
3.02	0.0452
3.19	0.0481
3.42	0.0534
3.47	0.0537
4.57	0.074
4.88	0.081
5.68	0.1006
5.86	0.1063
6.47	0.1249
7.04	0.1492
7.17	0.1601
7.3	0.1704
7.46	0.1758
7.66	0.2084
7.73	0.217
7.78	0.2235
7.81	0.2451
7.81	0.2645
7.79	0.2715
7.53	0.3105
7.54	0.3262
7.39	0.3449
7.34	0.3451
7.37	0.3567
7.19	0.366
7.25	0.3737
7.18	0.3773
6.8	0.4138
6.83	0.4216
6.51	0.4587
6.36	0.4604
5.94	0.5095
5.82	0.5194
5.44	0.5541
4.89	0.6125
4.36	0.6563
4.04	0.6887
3.92	0.7002
3.83	0.7057
3.79	0.7064
3.1	0.7612
2.51	0.8064
1.96	0.8503
1.93	0.8527
0.77	0.9471
Additional data with unitary variance
Critical point					Chart (double-click image to zoom in)
Griswold, J. - Wong, S.Y., Phase-​equilibria in the acetone-​methanol-​water system from 100° into the critical region, Chemical Engineering Progress Symposium Series. 48 (1952) 18-34.
T / K	P / bar	x₁
523.15	85.081	0.797
Bazaev, A. R. - Abdulagatov, I. M. - Magee, J. W. - Bazaev, E.A. - Ramazanova, A. E. - Abdurashidova, A. A., PVTx Measurements for a H2O + Methanol Mixture in the Subcritical and Supercritical Regions, International Journal of Thermophysics. 25 (2004) 805-838.
https://doi.org/10.1023/B:IJOT.0000034238.64651.32
T / K	P / bar	x₁
583.5	150	0.36

## Sheet: 1102_1123
Name	ETHANOL		3-METHYL-1-BUTANOL
CAS	64-17-5		123-51-3
Critical temperature / K	514		577.2
Critical pressure / bar	61.37		39.3
Acentric factor	0.644		0.59
	Source: DIPPR May 2017
Phase equilibrium data
Isothermal phase equilibrium data
Udovenko, V.V. - Frid, Ts.B., Heats of vaporization of binary mixtures. II, Zh. Fiz. Khim. 22 (1948) 1135-1145.
T / K =	323.15				Chart (double-click image to zoom in)
P / bar	x₁	y₁
0.056662	0.1	0.628
0.087193	0.2	0.784
0.11706	0.3	0.858
0.14572	0.4	0.9
0.17319	0.5	0.929
0.19825	0.6	0.95
0.22411	0.7	0.966
0.24905	0.8	0.979
0.27224	0.9	0.99
Udovenko, V.V. - Frid, Ts.B., Heats of vaporization of binary mixtures. II, Zh. Fiz. Khim. 22 (1948) 1135-1145.
T / K =	333.15				Chart (double-click image to zoom in)
P / bar	x₁	y₁
0.094926	0.1	0.594
0.14372	0.2	0.761
0.19052	0.3	0.84
0.23571	0.4	0.887
0.27744	0.5	0.92
0.31891	0.6	0.943
0.35877	0.7	0.97
0.3965	0.8	0.976
0.43476	0.9	0.989
Udovenko, V.V. - Frid, Ts.B., Heats of vaporization of binary mixtures. II, Zh. Fiz. Khim. 22 (1948) 1135-1145.
T / K =	343.15				Chart (double-click image to zoom in)
P / bar	x₁	y₁
0.15719	0.1	0.56
0.23038	0.2	0.732
0.30198	0.3	0.818
0.3713	0.4	0.872
0.43663	0.5	0.908
0.49876	0.6	0.934
0.55995	0.7	0.955
0.61795	0.8	0.972
0.67554	0.9	0.987
Udovenko, V.V. - Frid, Ts.B., Heats of vaporization of binary mixtures. II, Zh. Fiz. Khim. 22 (1948) 1135-1145.
T / K =	353.15				Chart (double-click image to zoom in)
P / bar	x₁	y₁
0.24665	0.1	0.526
0.35637	0.2	0.707
0.46143	0.3	0.799
0.56142	0.4	0.856
0.65141	0.5	0.906
0.74341	0.6	0.926
0.83353	0.7	0.949
0.91939	0.8	0.969
1.0022	0.9	0.985
Isobaric phase equilibrium data
Duran, Jairo A. - Córdoba, Fernando P. - Gil, Iván D. - Rodríguez, Gerardo - Orjuela, Alvaro, Vapor–liquid equilibrium of the ethanol+3-methyl-1-butanol system at 50.66, 101.33 and 151.99kPa, Fluid Phase Equilibria. 338 (2013) 128-134.
https://doi.org/10.1016/j.fluid.2012.11.004
P / bar =	0.5066				Chart (double-click image to zoom in)
T / K	x₁	y₁
374.7	0.0697	0.3849
360.32	0.2336	0.7298
356.55	0.2951	0.7901
348.21	0.4911	0.899
340.95	0.7153	0.9606
338.27	0.8182	0.9772
Gay, L., Distillation and rectification of complex mixtures. II, Chim. Ind. Genie Chim. 18 (1927) 187-203.
P / bar =	1.0133				Chart (double-click image to zoom in)
T / K	x₁	y₁
403.15	0.0047	0.0265
400.65	0.0235	0.124
398.15	0.0435	0.2125
395.65	0.065	0.298
393.15	0.0885	0.3735
388.15	0.1405	0.51
383.15	0.201	0.623
378.15	0.2725	0.7185
373.15	0.357	0.798
368.15	0.459	0.862
363.15	0.581	0.9193
360.65	0.652	0.9353
358.15	0.731	0.9552
355.65	0.8185	0.9729
353.15	0.9165	0.9889
Duran, Jairo A. - Córdoba, Fernando P. - Gil, Iván D. - Rodríguez, Gerardo - Orjuela, Alvaro, Vapor–liquid equilibrium of the ethanol+3-methyl-1-butanol system at 50.66, 101.33 and 151.99kPa, Fluid Phase Equilibria. 338 (2013) 128-134.
https://doi.org/10.1016/j.fluid.2012.11.004
P / bar =	1.5199				Chart (double-click image to zoom in)
T / K	x₁	y₁
394.42	0.1887	0.6189
382.29	0.3729	0.8074
379.83	0.4265	0.8385
372.5	0.6166	0.9192
371.19	0.6578	0.9311
369.33	0.7068	0.9433
361.72	0.994	0.999

## Sheet: 1102_1252
Name	ETHANOL		ACETIC ACID
CAS	64-17-5		64-19-7
Critical temperature / K	514		591.95
Critical pressure / bar	61.37		57.86
Acentric factor	0.644		0.467
	Source: DIPPR May 2017
Phase equilibrium data
Isothermal phase equilibrium data
Wright, E. H. M. - Akhtar, B. A., Soluble surface films of short-chain monocarboxylic acids on organic and aqueous substrates, Journal of the Chemical Society B: Physical Organic. (1970)
https://doi.org/10.1039/j29700000151
T / K =	303.15				Chart (double-click image to zoom in)
P / bar	x₁	y₁
0.033331	0.1	0.28
0.039997	0.22	0.5
0.053329	0.36	0.675
0.059995	0.44	0.7667
0.065995	0.51	0.8182
0.074661	0.62	0.8839
0.079993	0.7	0.9083
0.087993	0.8	0.947
Miyamoto, Shinji - Nakamura, Shinichi - Iwai, Yoshio - Arai, Yasuhiko, Measurement of Isothermal Vapor−Liquid Equilibria for Binary and Ternary Systems Containing Monocarboxylic Acid, Journal of Chemical & Engineering Data. 46 (2001) 1225-1230.
https://doi.org/10.1021/je0003849
T / K =	323.2				Chart (double-click image to zoom in)
P / bar	x₁	y₁
0.084006	0.058	0.11
0.090006	0.096	0.18
0.121	0.29	0.503
0.16	0.488	0.763
0.21	0.686	0.919
0.272	0.894	0.986
0.287	0.947	0.995
0.296	0.978	0.998
Isobaric phase equilibrium data
Reichl, Albert - Daiminger, Ulrich - Schmidt, Adolf - Davies, Michael - Hoffmann, Ulrich - Brinkmeier, Clemens - Reder, Christoph - Marquardt, Wolfgang, A non-recycle flow still for the experimental determination of vapor–liquid equilibria in reactive systems, Fluid Phase Equilibria. 153 (1998) 113-134.
https://doi.org/10.1016/S0378-3812(98)00409-9
P / bar =	1.014				Chart (double-click image to zoom in)
T / K	x₁	y₁
388.85	0.0311	0.0686
387.2	0.0586	0.1117
383.35	0.1288	0.2561
380.05	0.2003	0.3893
376.35	0.2808	0.5245
371.8	0.3991	0.6634
369.9	0.4408	0.7222
366.9	0.5129	0.8064
362.3	0.6396	0.8941
359.25	0.7162	0.9343
355.7	0.8432	0.9714
353.75	0.911	0.9923
Property change of mixing data
Enthalpy of mixing
Zhao, Junyang - Bao, Jingdan - Hu, Ying, Excess molar enthalpies of (an alkanol + a carboxylic acid) at 298.15 K measured with a Picker calorimeter, The Journal of Chemical Thermodynamics. 21 (1989) 811-818.
https://doi.org/10.1016/0021-9614(89)90027-X
T / K =	298.15				Chart (double-click image to zoom in)
P / bar =	UNKNOWN (1.0132)
hᴹ / J.mol⁻¹	x₁
99.86	0.0288
186.27	0.0655
244.02	0.1042
308.25	0.1426
336.55	0.1844
352.95	0.2381
350.73	0.3042
302.9	0.4103
239.78	0.5085
156.21	0.608
80.96	0.7123
44.62	0.812
23.02	0.8864
10.84	0.9423
Additional data with unitary variance
Critical point					Chart (double-click image to zoom in)
Hu, Tuoping - Qin, Zhangfeng - Wang, Guofu - Hou, Xianglin - Wang, Jianguo, Critical Properties of the Reacting Mixture in the Esterification of Acetic Acid with Ethanol, Journal of Chemical & Engineering Data. 49 (2004) 1809-1814.
https://doi.org/10.1021/je049771z
T / K	P / bar	x₁
527.7	66.9	0.8
540.6	72	0.6
547.7	74.1	0.5
556.5	74.9	0.4
565.1	75.1	0.3
575.1	71.9	0.2

## Sheet: 1102_1302
Name	ETHANOL		ETHYL FORMATE
CAS	64-17-5		109-94-4
Critical temperature / K	514		508.4
Critical pressure / bar	61.37		47.4
Acentric factor	0.644		0.285
	Source: DIPPR May 2017
Phase equilibrium data
Isothermal phase equilibrium data
Nagata, Isamu - Ohta, Tatsuhiko - Ogura, Michio - Yasuda, Shuhei, Excess Gibbs free energies and heats of mixing for binary systems: ethyl formate with methanol, ethanol, 1-propanol, and 2-propanol, Journal of Chemical & Engineering Data. 21 (1976) 310-313.
https://doi.org/10.1021/je60070a020
T / K =	318.15				Chart (double-click image to zoom in)
P / bar	x₁	y₁
0.32917	0.949	0.687
0.4609	0.845	0.446
0.50636	0.799	0.388
0.54262	0.752	0.353
0.60382	0.631	0.285
0.62448	0.59	0.267
0.63088	0.571	0.26
0.67928	0.418	0.213
0.68794	0.365	0.195
0.71554	0.227	0.151
0.72967	0.109	0.095
0.73301	0.05	0.046
Isobaric phase equilibrium data
Soto, Ana - Hernández, Pablo - Ortega, Juan, Experimental VLE at 101.32 kPa in binary systems composed of ethyl methanoate and alkan-1-ols or alkan-2-ols and treatment of data using a correlation with temperature-dependent parameters, Fluid Phase Equilibria. 146 (1998) 351-370.
https://doi.org/10.1016/S0378-3812(98)00193-9
P / bar =	1.0132				Chart (double-click image to zoom in)
T / K	x₁	y₁
350.48	0.989	0.954
348.98	0.975	0.888
347.66	0.962	0.831
345.88	0.942	0.762
344.03	0.92	0.69
341.69	0.886	0.608
340.01	0.859	0.552
338.14	0.82	0.492
336.53	0.779	0.443
335.43	0.746	0.412
334.39	0.71	0.383
333.62	0.681	0.361
333.03	0.655	0.344
332.4	0.624	0.326
331.83	0.591	0.308
331.32	0.558	0.293
330.89	0.529	0.28
330.53	0.505	0.269
330.25	0.482	0.259
329.96	0.459	0.249
329.63	0.429	0.238
329.36	0.406	0.23
329.08	0.379	0.218
328.81	0.349	0.209
328.56	0.323	0.198
328.27	0.286	0.182
328.11	0.26	0.171
327.84	0.225	0.155
327.71	0.206	0.146
327.58	0.176	0.131
327.48	0.161	0.123
327.34	0.125	0.104
327.27	0.102	0.088
327.24	0.083	0.074
327.19	0.065	0.061
327.23	0.0235	0.0235	AZEO
327.23	0.019	0.022
Property change of mixing data
Enthalpy of mixing
López, M. - Fernández, J. - Sarmiento, F. - Legido, J. L. - Romani, L. - Jiménez, E. - Paz Andrade, M. I., Excess molar enthalpies at the temperature 298.15 K of (an n-alkyl formate + an n-alkanol) IV. {xHCO2(CH2)iCH3 + (1 − x)CjH2j+1OH} (i = 0 to 3 and j = 1 and 2), The Journal of Chemical Thermodynamics. 24 (1992) 809-814.
https://doi.org/10.1016/S0021-9614(05)80225-3
T / K =	298.15				Chart (double-click image to zoom in)
P / bar =	UNKNOWN (1.0132)
hᴹ / J.mol⁻¹	x₁
340	0.9298
604	0.8652
861	0.7886
976	0.7449
1162	0.6551
1245	0.5948
1280	0.5698
1330	0.5201
1350	0.4697
1356	0.4402
1353	0.4149
1342	0.3815
1328	0.3543
1290	0.3162
1223	0.2749
1127	0.2276
973	0.1719
708	0.1079
434	0.0588
Hu, Jianhua - Tamura, Katsutoshi - Murakami, Sachio, Excess thermodynamic properties of binary mixtures of ethyl formate with benzene, ethanol, and 2,2,2-trifluoroethan-1-ol at 298.15 K, Fluid Phase Equilibria. 131 (1997) 197-212.
https://doi.org/10.1016/S0378-3812(96)03230-X
T / K =	298.15				Chart (double-click image to zoom in)
P / bar =	UNKNOWN (1.0132)
hᴹ / J.mol⁻¹	x₁
104.6	0.975
230.9	0.95
458.4	0.9
648	0.85
815	0.8
959	0.75
1080	0.7
1181	0.65
1262	0.6
1323	0.55
1363	0.5
1383	0.45
1378	0.4
1349	0.35
1292	0.3
1205	0.25
1079	0.2
908	0.15
683	0.1
381.6	0.05
205.7	0.025
Nagata, Isamu - Ohta, Tatsuhiko - Ogura, Michio - Yasuda, Shuhei, Excess Gibbs free energies and heats of mixing for binary systems: ethyl formate with methanol, ethanol, 1-propanol, and 2-propanol, Journal of Chemical & Engineering Data. 21 (1976) 310-313.
https://doi.org/10.1021/je60070a020
T / K =	308.15				Chart (double-click image to zoom in)
P / bar =	UNKNOWN (1.0132)
hᴹ / J.mol⁻¹	x₁
235.72	0.9487
298.1	0.9322
696.68	0.8186
969.66	0.7093
1117	0.6073
1188.2	0.511
1205.4	0.5024
1206.2	0.4053
1091.1	0.3105
1077.3	0.2911
928.63	0.2172
786.28	0.1639
603.32	0.1154
301.03	0.05
Nagata, Isamu - Ohta, Tatsuhiko - Ogura, Michio - Yasuda, Shuhei, Excess Gibbs free energies and heats of mixing for binary systems: ethyl formate with methanol, ethanol, 1-propanol, and 2-propanol, Journal of Chemical & Engineering Data. 21 (1976) 310-313.
https://doi.org/10.1021/je60070a020
T / K =	318.15				Chart (double-click image to zoom in)
P / bar =	UNKNOWN (1.0132)
hᴹ / J.mol⁻¹	x₁
249.11	0.9473
784.61	0.8027
1020.3	0.7006
1169.4	0.6062
1223.4	0.4568
1213.3	0.4112
1138.4	0.3328
1140.1	0.3086
895.14	0.2005
812.24	0.1701
565.64	0.1056
Heat capacity of mixing
Hu, Jianhua - Tamura, Katsutoshi - Murakami, Sachio, Excess thermodynamic properties of binary mixtures of ethyl formate with benzene, ethanol, and 2,2,2-trifluoroethan-1-ol at 298.15 K, Fluid Phase Equilibria. 131 (1997) 197-212.
https://doi.org/10.1016/S0378-3812(96)03230-X
T / K =	298.15				Chart (double-click image to zoom in)
P / bar =	UNKNOWN (1.0132)
cᴘᴹ / J.mol⁻¹.K⁻¹	x₁
0.81	0.975
1.59	0.95
3.17	0.9
4.65	0.85
5.68	0.8
6.72	0.75
7.53	0.7
8.24	0.65
8.72	0.6
9.08	0.55
9.18	0.5
9.13	0.45
8.81	0.4
8.33	0.35
7.59	0.3
6.64	0.25
5.39	0.2
3.93	0.15
2.3	0.1
0.83	0.05
0.3	0.025

## Sheet: 1102_1921
Name	ETHANOL		WATER
CAS	64-17-5		7732-18-5
Critical temperature / K	514		647.096
Critical pressure / bar	61.37		220.64
Acentric factor	0.644		0.345
	Source: DIPPR May 2017
Phase equilibrium data
Isothermal phase equilibrium data
Hall, D.J. - Mash, C.J. - Pemberton, R.C., Vapor liquid equilibriums for the systems water-​methanol, water-​ethanol, methanol-​ethanol, and water-​methanol-​ethanol at 298.15 K determined by a rapid transpiration method (1979) 1-13.
T / K =	298.15				Chart (double-click image to zoom in)
P / bar	x₁	y₁
0.04444	0.055	0.323
0.05608	0.1246	0.497
0.06397	0.2142	0.579
0.06987	0.3941	0.648
0.07355	0.5496	0.7005
0.07574	0.7006	0.7685
0.07695	0.7842	0.8185
0.07825	0.8396	0.8585
0.07798	0.879	0.8895
0.07879	0.9365	0.939
Dobson, Hilyard John Eglinton, CCCXCVII.—The partial pressures of aqueous ethyl alcohol, J. Chem. Soc., Trans. 127 (1925) 2866-2873.
https://doi.org/10.1039/CT9252702866
T / K =	298.15				Chart (double-click image to zoom in)
P / bar	x₁	y₁
0.04422	0.0523	0.3164
0.05125	0.0916	0.4334
0.05789	0.1343	0.5037
0.06092	0.1671	0.5449
0.06294	0.2022	0.5683
0.0671	0.2848	0.6105
0.06822	0.3368	0.6286
0.07193	0.4902	0.679
0.07427	0.582	0.7095
0.07743	0.781	0.8161
Pemberton, R.C - Mash, C.J, Thermodynamic properties of aqueous non-electrolyte mixtures II. Vapour pressures and excess Gibbs energies for water + ethanol at 303.15 to 363.15 K determined by an accurate static method, The Journal of Chemical Thermodynamics. 10 (1978) 867-888.
https://doi.org/10.1016/0021-9614(78)90160-X
T / K =	303.15				Chart (double-click image to zoom in)
P / bar	x₁	y₁
0.04413	0.0043	0.0412
0.04803	0.0152	0.128
0.05203	0.0273	0.2043
0.05781	0.0463	0.2975
0.06386	0.0678	0.3753
0.07329	0.1099	0.4743
0.08189	0.1711	0.5479
0.08723	0.2469	0.5907
0.09085	0.3239	0.6194
0.09303	0.3866	0.6406
0.09403	0.4176	0.6508
0.09663	0.5049	0.6797
0.09869	0.5809	0.7087
0.09999	0.6343	0.7329
0.10199	0.7246	0.781
0.10341	0.8084	0.8337
0.10394	0.8579	0.8705
0.10427	0.8906	0.8979
0.10435	0.8993	0.9056
0.10445	0.9244	0.9284
0.10457	0.9537	0.9556
0.10467	0.9731	0.9739
0.10473	0.9815	0.9819
Vu, Dung T. - Lira, Carl T. - Asthana, Navinchandra S. - Kolah, Aspi K. - Miller, Dennis J., Vapor−Liquid Equilibria in the Systems Ethyl Lactate + Ethanol and Ethyl Lactate + Water, Journal of Chemical & Engineering Data. 51 (2006) 1220-1225.
https://doi.org/10.1021/je050537y
T / K =	313.15				Chart (double-click image to zoom in)
P / bar	x₁	y₁
0.0783	0.005	0.036
0.080807	0.007	0.069
0.0827	0.01	0.096
0.0855	0.014	0.133
0.089699	0.02	0.181
0.093206	0.026	0.221
0.098499	0.035	0.269
0.10641	0.05	0.332
0.1172	0.075	0.407
0.1217	0.085	0.421
0.1301	0.108	0.478
0.1312	0.111	0.474
0.1377	0.136	0.519
0.1425	0.158	0.541
0.14929	0.201	0.573
0.15509	0.256	0.598
0.15789	0.319	0.612
0.16371	0.418	0.655
0.16571	0.448	0.66
0.1696	0.518	0.697
0.17211	0.583	0.73
0.17511	0.682	0.767
0.17711	0.748	0.805
0.17811	0.828	0.841
0.17951	0.892	0.893
0.18	0.943	0.96
Kurihara, Kiyofumi - Minoura, Tsuyoshi - Takeda, Kouichi - Kojima, Kazuo, Isothermal Vapor-Liquid Equilibria for Methanol + Ethanol + Water, Methanol + Water, and Ethanol + Water, Journal of Chemical & Engineering Data. 40 (1995) 679-684.
https://doi.org/10.1021/je00019a033
T / K =	323.15				Chart (double-click image to zoom in)
P / bar	x₁	y₁
0.20333	0.0874	0.4341
0.20904	0.0967	0.4549
0.22795	0.1411	0.512
0.23663	0.1756	0.5372
0.24337	0.2065	0.5562
0.2457	0.2253	0.5636
0.25025	0.2552	0.5761
0.25437	0.2856	0.589
0.25815	0.3133	0.6008
0.26259	0.3535	0.6133
0.2648	0.3773	0.6226
0.26694	0.3999	0.6311
0.26898	0.4258	0.6397
0.27284	0.4691	0.6563
0.27535	0.4987	0.666
0.277	0.5218	0.6741
0.2788	0.5421	0.684
0.281	0.5692	0.6971
0.28216	0.5907	0.705
0.28448	0.6242	0.7205
0.28711	0.6697	0.7434
0.28828	0.6868	0.7523
0.29195	0.7586	0.794
0.29254	0.7811	0.8081
0.29406	0.8299	0.8429
0.29487	0.8454	0.8555
0.2948	0.8559	0.8639
0.29478	0.8638	0.8699
0.29498	0.8713	0.8769
0.29518	0.8801	0.8849
0.29538	0.8911	0.8948
0.29531	0.9031	0.9065
0.2956	0.9136	0.9151
0.29566	0.9263	0.9273
0.29548	0.9528	0.9512
Pemberton, R.C - Mash, C.J, Thermodynamic properties of aqueous non-electrolyte mixtures II. Vapour pressures and excess Gibbs energies for water + ethanol at 303.15 to 363.15 K determined by an accurate static method, The Journal of Chemical Thermodynamics. 10 (1978) 867-888.
https://doi.org/10.1016/0021-9614(78)90160-X
T / K =	323.15				Chart (double-click image to zoom in)
P / bar	x₁	y₁
0.12921	0.0043	0.0478
0.14249	0.0152	0.145
0.15555	0.0272	0.2259
0.17379	0.0463	0.3182
0.19088	0.0678	0.3893
0.21522	0.1098	0.4738
0.23585	0.171	0.5355
0.24961	0.2468	0.5753
0.25933	0.3238	0.6044
0.26572	0.3884	0.627
0.26836	0.4175	0.637
0.27564	0.5049	0.6681
0.28131	0.5808	0.6989
0.28489	0.6343	0.7239
0.29006	0.7245	0.7735
0.29176	0.7638	0.7981
0.29346	0.8084	0.8286
0.2947	0.8579	0.8664
0.29511	0.8906	0.8942
0.29527	0.8993	0.9019
Mertl, I., Liquid-vapour equilibrium. IL. Phase equilibria in the ternary system ethyl acetate-ethanol-water, Collection of Czechoslovak Chemical Communications. 37 (1972) 366-374.
https://doi.org/10.1135/cccc19720366
T / K =	343.15				Chart (double-click image to zoom in)
P / bar	x₁	y₁
0.48329	0.062	0.374
0.53196	0.095	0.439
0.56529	0.131	0.482
0.60115	0.194	0.524
0.62395	0.252	0.552
0.64728	0.334	0.583
0.66341	0.401	0.611
0.70114	0.593	0.691
0.71234	0.68	0.739
0.72354	0.793	0.816
0.72407	0.81	0.826
0.72594	0.943	0.941
0.72594	0.947	0.945
Pemberton, R.C - Mash, C.J, Thermodynamic properties of aqueous non-electrolyte mixtures II. Vapour pressures and excess Gibbs energies for water + ethanol at 303.15 to 363.15 K determined by an accurate static method, The Journal of Chemical Thermodynamics. 10 (1978) 867-888.
https://doi.org/10.1016/0021-9614(78)90160-X
T / K =	343.15				Chart (double-click image to zoom in)
P / bar	x₁	y₁
0.3276	0.0043	0.0512
0.36359	0.0152	0.1532
0.39819	0.0271	0.2348
0.44442	0.0462	0.3245
0.48569	0.0676	0.3906
0.54055	0.1097	0.4662
0.58586	0.1709	0.5216
0.61796	0.2467	0.5604
0.64113	0.3237	0.5904
0.65695	0.3883	0.6139
0.66342	0.4173	0.6244
0.68138	0.5047	0.6578
0.69518	0.5807	0.6907
0.70396	0.6342	0.717
0.71591	0.7244	0.7681
0.7197	0.7637	0.7934
0.72315	0.8084	0.8247
0.72552	0.8578	0.8635
0.72623	0.8906	0.8917
0.72614	0.8993	0.8995
0.72593	0.9244	0.9229
0.72512	0.9537	0.9515
0.72433	0.9731	0.9713
0.72388	0.9815	0.9801
Pemberton, R.C - Mash, C.J, Thermodynamic properties of aqueous non-electrolyte mixtures II. Vapour pressures and excess Gibbs energies for water + ethanol at 303.15 to 363.15 K determined by an accurate static method, The Journal of Chemical Thermodynamics. 10 (1978) 867-888.
https://doi.org/10.1016/0021-9614(78)90160-X
T / K =	363.15				Chart (double-click image to zoom in)
P / bar	x₁	y₁
0.73726	0.0043	0.052
0.81909	0.0151	0.1539
0.8962	0.0269	0.2337
0.99667	0.0459	0.32
1.083	0.0673	0.3823
1.1955	0.1094	0.453
1.2881	0.1706	0.5058
1.3564	0.2464	0.5449
1.4068	0.3236	0.5763
1.4419	0.388	0.601
1.4562	0.417	0.6123
1.496	0.5044	0.648
1.5262	0.5804	0.683
1.5447	0.634	0.7106
1.57	0.7243	0.7639
1.5781	0.7636	0.7901
1.5849	0.8083	0.8224
1.5891	0.8578	0.8618
1.5899	0.8907	0.8903
1.5896	0.8993	0.8981
1.5887	0.9244	0.9216
1.586	0.9537	0.9506
1.5835	0.9731	0.9708
1.5823	0.9815	0.9797
Niesen, V. - Palavra, A. - Kidnay, A. J. - Yesavage, V. F., An apparatus for vapor—liquid equilibrium at elevated temperatures and pressures and selected results for the water—ethanol and methanol—ethanol systems, Fluid Phase Equilibria. 31 (1986) 283-298.
https://doi.org/10.1016/0378-3812(86)87013-3
T / K =	523.15				Chart (double-click image to zoom in)
P / bar	x₁	y₁
53.023	0.101	0.26
58.056	0.205	0.362
64.468	0.37	0.475
69.639	0.59	0.62
71.018	0.679	0.693
71.225	0.685	0.697
Barr-David, Frank - Dodge, B. F., Vapor-Liquid Equilibrium at High Pressures. The Systems Ethanol-Water and 2-Propanol-Water., Journal of Chemical & Engineering Data. 4 (1959) 107-121.
https://doi.org/10.1021/je60002a003
T / K =	523.15				Chart (double-click image to zoom in)
P / bar	x₁	y₁
40.817	0.009	0.044
45.85	0.034	0.135
49.504	0.063	0.206
52.676	0.098	0.264
54.813	0.135	0.306
57.02	0.172	0.34
59.157	0.223	0.376
61.501	0.285	0.417
62.742	0.339	0.446
64.811	0.402	0.487
66.534	0.463	0.53
69.154	0.565	0.605
71.154	0.673	0.69
71.706	0.79	0.79	CRIT
Barr-David, Frank - Dodge, B. F., Vapor-Liquid Equilibrium at High Pressures. The Systems Ethanol-Water and 2-Propanol-Water., Journal of Chemical & Engineering Data. 4 (1959) 107-121.
https://doi.org/10.1021/je60002a003
T / K =	548.15				Chart (double-click image to zoom in)
P / bar	x₁	y₁
61.363	0.007	0.029
67.913	0.033	0.112
73.084	0.065	0.177
77.221	0.105	0.233
80.876	0.149	0.277
84.116	0.201	0.322
88.391	0.273	0.377
92.734	0.348	0.429
93.975	0.374	0.441
95.975	0.414	0.465
97.975	0.455	0.486
98.595	0.51	0.51	CRIT
Barr-David, Frank - Dodge, B. F., Vapor-Liquid Equilibrium at High Pressures. The Systems Ethanol-Water and 2-Propanol-Water., Journal of Chemical & Engineering Data. 4 (1959) 107-121.
https://doi.org/10.1021/je60002a003
T / K =	573.15				Chart (double-click image to zoom in)
P / bar	x₁	y₁
88.46	0.006	0.024
95.285	0.03	0.087
101.35	0.057	0.138
105.83	0.091	0.186
112.66	0.128	0.228
118.59	0.178	0.276
123.07	0.246	0.315
125.48	0.33	0.33	CRIT
Barr-David, Frank - Dodge, B. F., Vapor-Liquid Equilibrium at High Pressures. The Systems Ethanol-Water and 2-Propanol-Water., Journal of Chemical & Engineering Data. 4 (1959) 107-121.
https://doi.org/10.1021/je60002a003
T / K =	598.15				Chart (double-click image to zoom in)
P / bar	x₁	y₁
123.97	0.007	0.018
133.55	0.035	0.075
140.1	0.063	0.114
143.76	0.084	0.134
150.65	0.121	0.173
155.13	0.161	0.191
157.06	0.19	0.192
157.06	0.191	0.191	CRIT
Barr-David, Frank - Dodge, B. F., Vapor-Liquid Equilibrium at High Pressures. The Systems Ethanol-Water and 2-Propanol-Water., Journal of Chemical & Engineering Data. 4 (1959) 107-121.
https://doi.org/10.1021/je60002a003
T / K =	623.15				Chart (double-click image to zoom in)
P / bar	x₁	y₁
170.64	0.008	0.016
180.64	0.033	0.057
185.54	0.052	0.074
Isobaric phase equilibrium data
Voutsas, Epaminondas C. - Pamouktsis, Christos - Argyris, Dimitrios - Pappa, Georgia D., Measurements and thermodynamic modeling of the ethanol–water system with emphasis to the azeotropic region, Fluid Phase Equilibria. 308 (2011) 135-141.
https://doi.org/10.1016/j.fluid.2011.06.009
P / bar =	0.1971				Chart (double-click image to zoom in)
T / K	x₁	y₁
323.53	0.076	0.407
320.52	0.141	0.51
318.05	0.26	0.592
317.04	0.39	0.632
316.35	0.499	0.679
315.9	0.599	0.706
315.55	0.688	0.76
315.29	0.799	0.826
315.26	0.805	0.828
315.19	0.841	0.854
315.15	0.883	0.888
315.16	0.913	0.915
315.16	0.916	0.916	AZEO
Jones, C. A. - Schoenborn, E. M. - Colburn, A. P., Equilibrium Still for Miscible Liquids, Industrial & Engineering Chemistry. 35 (1943) 666-672.
https://doi.org/10.1021/ie50402a009
P / bar =	1.0133				Chart (double-click image to zoom in)
T / K	x₁	y₁
368.65	0.018	0.179
363.75	0.054	0.3375
358.55	0.124	0.47
356.85	0.176	0.514
355.9	0.23	0.542
355.15	0.288	0.57
354.15	0.385	0.612
353.65	0.44	0.633
352.95	0.514	0.657
352.05	0.673	0.735
351.41	0.84	0.85
Hughes, H.E. - Maloney, J.O., Application of radioactive tracers to diffusional operations. Binary and ternary equilibrium data, Chem. Eng. Progr. 48 (1952) 192-200.
P / bar =	1.0133				Chart (double-click image to zoom in)
T / K	x₁	y₁
372.08	0.0044	0.051
370.2	0.011	0.123
365.45	0.034	0.261
361.47	0.068	0.383
360.62	0.077	0.411
358.64	0.116	0.464
357.9	0.135	0.476
357.49	0.147	0.499
356.62	0.177	0.516
356.57	0.178	0.519
356.09	0.207	0.536
355.65	0.233	0.544
355.71	0.236	0.541
355.14	0.27	0.562
354.99	0.287	0.572
354.05	0.361	0.605
354.07	0.37	0.601
353.06	0.48	0.645
351.31	0.904	0.9
Kojima, K. - Tochigi, K. - Seki, H. - Watase, K., Determination of vapor-​liquid equilibriums from boiling point curves, Kagaku Kogaku. 32 (1968) 149-153.
https://doi.org/10.1252/kakoronbunshu1953.32.149
P / bar =	1.0133				Chart (double-click image to zoom in)
T / K	x₁	y₁
363.15	0.05	0.3372
359.08	0.1	0.4521
357.12	0.15	0.5056
356.05	0.2	0.5359
355.29	0.25	0.5589
354.67	0.3	0.5794
354.14	0.35	0.5987
353.67	0.4	0.6177
353.25	0.45	0.6371
352.9	0.5	0.6558
352.57	0.55	0.6765
352.28	0.6	0.6986
352	0.65	0.725
351.75	0.7	0.755
351.57	0.75	0.784
351.45	0.8	0.8167
351.37	0.85	0.8591
351.35	0.9	0.8959
351.39	0.95	0.9474
Bloom, C. H. - Clump, C. W. - Koeckert, A. H., Simultaneous Measurement of Vapor-Liquid Equilibria and Latent Heats of Vaporization, Industrial & Engineering Chemistry. 53 (1961) 829-832.
https://doi.org/10.1021/ie50622a029
P / bar =	1.0133				Chart (double-click image to zoom in)
T / K	x₁	y₁
367.45	0.021	0.199
365.05	0.033	0.272
363.15	0.05	0.353
360.45	0.085	0.411
359.25	0.105	0.458
358.35	0.125	0.488
357.85	0.135	0.484
354.95	0.315	0.571
354.75	0.321	0.572
352.65	0.556	0.675
352.35	0.602	0.695
352.25	0.643	0.713
351.75	0.689	0.741
351.35	0.984	0.984	AZEO
351.35	0.987	0.985
Stabnikov, V.N. - Matyushev, B.Z. - Protsyuk, T.B. - Yushchenko, N.M., Equilibrium in the ethyl alcohol-​water system at atmospheric pressure, Pishch. Promst. Kiev. 15 (1972) 49-56.
P / bar =	1.0133				Chart (double-click image to zoom in)
T / K	x₁	y₁
372.96	0.001	0.01
372.77	0.002	0.0205
372.58	0.003	0.0312
372.39	0.004	0.0421
372.2	0.005	0.0532
372.01	0.006	0.0644
371.82	0.007	0.0753
371.63	0.008	0.0858
371.44	0.009	0.0958
371.25	0.01	0.104
370.73	0.012	0.12
370.21	0.014	0.136
369.69	0.016	0.1509
369.17	0.018	0.1655
368.65	0.02	0.18
368.08	0.022	0.1943
367.61	0.024	0.208
367.09	0.026	0.2205
366.57	0.028	0.2327
366.05	0.03	0.2442
365	0.035	0.2695
364.2	0.04	0.2905
363.62	0.045	0.3075
363.05	0.05	0.3245
362.6	0.055	0.34
362.07	0.06	0.3545
361.65	0.065	0.366
361.28	0.07	0.3775
360.91	0.075	0.3885
360.6	0.08	0.399
360.25	0.085	0.4091
359.92	0.09	0.419
359.61	0.095	0.4283
359.35	0.1	0.437
359.11	0.105	0.445
358.88	0.11	0.4528
358.65	0.115	0.4605
358.43	0.12	0.4675
358.25	0.125	0.474
358.05	0.13	0.48
357.87	0.135	0.4855
357.7	0.14	0.49
357.51	0.145	0.494
357.35	0.15	0.498
357.31	0.155	0.5002
357.07	0.16	0.5055
356.93	0.165	0.509
356.8	0.17	0.512
356.65	0.175	0.5145
356.52	0.18	0.5175
356.4	0.185	0.52
356.27	0.19	0.523
356.15	0.195	0.5255
356.05	0.2	0.528
355.93	0.21	0.533
355.7	0.22	0.5375
355.58	0.23	0.542
355.43	0.24	0.546
355.31	0.25	0.5505
355.2	0.26	0.5545
355.09	0.27	0.559
355	0.28	0.5635
354.9	0.29	0.568
354.79	0.3	0.5725
354.7	0.31	0.5765
354.6	0.32	0.5805
354.49	0.33	0.584
354.4	0.34	0.588
354.3	0.35	0.592
354.2	0.36	0.5955
354.1	0.37	0.5992
354.02	0.38	0.6032
353.9	0.39	0.6068
353.81	0.4	0.6102
353.72	0.41	0.6135
353.63	0.42	0.617
353.54	0.43	0.6205
353.44	0.44	0.6245
353.4	0.45	0.628
353.33	0.46	0.632
353.25	0.47	0.6355
353.18	0.48	0.6395
353.11	0.49	0.6435
353.04	0.5	0.6475
352.99	0.51	0.652
352.92	0.52	0.6565
352.9	0.53	0.661
352.86	0.54	0.666
352.8	0.55	0.671
352.75	0.56	0.676
352.7	0.57	0.681
352.65	0.58	0.6865
352.59	0.59	0.692
352.55	0.6	0.698
352.5	0.61	0.703
352.45	0.62	0.709
352.42	0.63	0.7145
352.35	0.64	0.72
352.3	0.65	0.7255
352.25	0.66	0.731
352.2	0.67	0.7365
352.15	0.68	0.742
352.1	0.69	0.7475
352.04	0.7	0.753
352.01	0.71	0.759
351.95	0.72	0.765
351.91	0.73	0.771
351.86	0.74	0.777
351.81	0.75	0.783
351.75	0.76	0.789
351.72	0.77	0.795
351.68	0.78	0.8015
351.65	0.79	0.808
351.62	0.8	0.8155
351.59	0.81	0.8225
351.55	0.82	0.83
351.52	0.83	0.8385
351.49	0.84	0.847
351.46	0.85	0.856
351.43	0.86	0.8645
351.39	0.87	0.873
351.36	0.88	0.8806
351.33	0.89	0.8905
351.35	0.9	0.899
351.4	0.9062	0.9062	AZEO
351.4	0.91	0.9075
351.45	0.919	0.9158
Otsuki, H. - Williams, F.C., Effect of pressure on vapor-​liquid equilibria for the system ethyl alcohol-​water, Chem. Eng. Progr. Symp. Ser. 49 (1953) 55-67.
P / bar =	3.4477				Chart (double-click image to zoom in)
T / K	x₁	y₁
408.65	0.0076	0.0718
404.35	0.023	0.191
401.85	0.0392	0.265
399.25	0.059	0.321
398.55	0.0675	0.338
396.45	0.0866	0.391
395.65	0.101	0.411
394.45	0.12	0.433
393.55	0.135	0.454
392.55	0.184	0.492
390.25	0.263	0.536
389.45	0.324	0.566
388.45	0.421	0.604
387.75	0.496	0.638
387.05	0.588	0.684
386.45	0.688	0.739
386.05	0.806	0.82
Otsuki, H. - Williams, F.C., Effect of pressure on vapor-​liquid equilibria for the system ethyl alcohol-​water, Chem. Eng. Progr. Symp. Ser. 49 (1953) 55-67.
P / bar =	6.8954				Chart (double-click image to zoom in)
T / K	x₁	y₁
435.25	0.0075	0.057
433.55	0.0141	0.109
430.15	0.0275	0.185
427.15	0.0412	0.255
424.75	0.0583	0.31
424.55	0.0635	0.314
422.65	0.0807	0.356
420.95	0.103	0.386
419.25	0.139	0.426
417.95	0.171	0.456
415.85	0.253	0.507
414.65	0.315	0.54
413.05	0.432	0.594
412.15	0.513	0.634
411.35	0.589	0.673
410.65	0.661	0.717
410.05	0.761	0.785
Property change of mixing data
Enthalpy of mixing
Friese, T. - Ulbig, P. - Schulz, S. - Wagner, K., Effect of NaCl or KCl on the Excess Enthalpies of Alkanol + Water Mixtures at Various Temperatures and Salt Concentrations 44 (1999) 701-714.
https://doi.org/10.1021/je980303x
T / K =	285.65				Chart (double-click image to zoom in)
P / bar =	UNKNOWN (1.0132)
hᴹ / J.mol⁻¹	x₁
-288.5	0.025
-534.3	0.05
-723.9	0.075
-854.9	0.1
-929.4	0.125
-958.5	0.15
-958.2	0.175
-938.5	0.2
-910.7	0.225
-879.3	0.25
-845.2	0.275
-806.8	0.3
-717.2	0.36
-635.7	0.42
-559.8	0.48
-490.5	0.54
-430.2	0.6
-381.3	0.66
-335.4	0.72
-291.6	0.78
-242.7	0.84
-178.2	0.901
-86	0.959
Ott, J.B. - Stouffer, C.E. - Cornett, G.V. - Woodfield, B.F. - Wirthlin, R.C. - Christensen, J.J. - Deiters, U.K., Excess enthalpies for (ethanol + water) at 298.15 K and pressures of 0.4, 5, 10, and 15 MPa, The Journal of Chemical Thermodynamics. 18 (1986) 1-12.
https://doi.org/10.1016/0021-9614(86)90036-4
T / K =	298.15				Chart (double-click image to zoom in)
P / bar =	100
hᴹ / J.mol⁻¹	z₁
-290.3	0.0303
-580.1	0.0705
-707	0.1005
-755.9	0.1206
-781.5	0.1412
-788.2	0.1606
-775.6	0.2012
-725.6	0.2514
-664	0.3012
-599.6	0.352
-536.9	0.4027
-480.9	0.4518
-428.6	0.5023
-384.2	0.551
-343.5	0.602
-310.6	0.6525
-281.1	0.7012
-256.7	0.7507
-227.2	0.8005
-197	0.8505
-152.5	0.8999
-93.2	0.9482
Friese, T. - Ulbig, P. - Schulz, S. - Wagner, K., Effect of NaCl or KCl on the Excess Enthalpies of Alkanol + Water Mixtures at Various Temperatures and Salt Concentrations 44 (1999) 701-714.
https://doi.org/10.1021/je980303x
T / K =	338.15				Chart (double-click image to zoom in)
P / bar =	UNKNOWN (1.0132)
hᴹ / J.mol⁻¹	x₁
-108.8	0.025
-188.6	0.05
-238.5	0.075
-261.9	0.1
-263.9	0.125
-253.3	0.15
-232.5	0.175
-208.9	0.2
-156.9	0.25
-100.6	0.3
-49	0.35
-2.8	0.4
36.2	0.45
66.7	0.5
87.7	0.55
99.5	0.6
102.1	0.65
96.8	0.7
83.1	0.75
42.3	0.849
30.7	0.901
23.7	0.95
Ott, J.B. - Cornett, G.V. - Stouffer, C.E. - Woodfield, B.F. - Guanquan, C. - Christensen, J.J., Excess enthalpies of (ethanol+water) at 323.15, 333.15, 348.15, and 373.15 K and from 0.4 to 15 MPa, The Journal of Chemical Thermodynamics. 18 (1986) 867-875.
https://doi.org/10.1016/0021-9614(86)90121-7
T / K =	373.15				Chart (double-click image to zoom in)
P / bar =	10
hᴹ / J.mol⁻¹	z₁
-8.7	0.01
-14.2	0.0198
-16.4	0.0301
-15.1	0.0403
-11.5	0.0503
6.7	0.0736
39.8	0.1
76	0.1241
120.4	0.1504
199.7	0.2002
270.6	0.2502
333.7	0.2999
387.9	0.3505
429.7	0.4011
458.4	0.4502
475.8	0.5007
474.3	0.5494
463.2	0.6006
438.4	0.6511
402.9	0.6999
356.2	0.7495
297.8	0.7996
230	0.8497
156.6	0.8993
85.5	0.9478
Ott, J.B - Stouffer, C.E - Cornett, G.V - Woodfield, B.F - Guanquan, Che - Christensen, J.J, Excess enthalpies for (ethanol + water) at 398.15, 423.15, 448.15, and 473.15 K and at pressures of 5 and 15 MPa. Recommendations for choosing (ethanol + water) as an HmE reference mixture, The Journal of Chemical Thermodynamics. 19 (1987) 337-348.
https://doi.org/10.1016/0021-9614(87)90115-7
T / K =	423.15				Chart (double-click image to zoom in)
P / bar =	50
hᴹ / J.mol⁻¹	z₁
165.2	0.0504
331.9	0.1002
479.3	0.1508
602.9	0.2007
700.6	0.2507
780.9	0.3005
839.2	0.3512
878.8	0.4018
895	0.4509
894.9	0.5014
877.2	0.5501
839.8	0.6013
789.2	0.6518
718.6	0.7005
635.8	0.7501
533.4	0.8001
420.2	0.8501
293.8	0.8996
160	0.948
Ott, J.B - Stouffer, C.E - Cornett, G.V - Woodfield, B.F - Guanquan, Che - Christensen, J.J, Excess enthalpies for (ethanol + water) at 398.15, 423.15, 448.15, and 473.15 K and at pressures of 5 and 15 MPa. Recommendations for choosing (ethanol + water) as an HmE reference mixture, The Journal of Chemical Thermodynamics. 19 (1987) 337-348.
https://doi.org/10.1016/0021-9614(87)90115-7
T / K =	473.15				Chart (double-click image to zoom in)
P / bar =	50
hᴹ / J.mol⁻¹	z₁
274.8	0.0504
506	0.1002
695.3	0.1508
847.2	0.2007
961.9	0.2507
1044	0.3005
1104.1	0.3512
1137.1	0.4018
1140	0.4509
1137.9	0.5014
1110	0.5501
1056	0.6013
984.8	0.6518
896.4	0.7005
785.1	0.7501
659.9	0.8001
514.5	0.8501
357.9	0.8996
187	0.948
Wormald, C.J. - Lloyd, M.J., Excess enthalpies for (water + ethanol) atT= 398 K toT= 548 K andp= 15 MPa, The Journal of Chemical Thermodynamics. 28 (1996) 615-626.
https://doi.org/10.1006/jcht.1996.0058
T / K =	538				Chart (double-click image to zoom in)
P / bar =	150
hᴹ / J.mol⁻¹	z₁
1354	0.2
1550	0.25
1705	0.3
1800	0.35
1868	0.4
1917	0.45
1920	0.5
1861	0.55
1797	0.6
1705	0.65
1529	0.7
1382	0.75
1096	0.8
916	0.85
650	0.9
Heat capacity of mixing
Benson, George C. - D'Arcy, Patrick J., Excess isobaric heat capacities of water-n-alcohol mixtures, Journal of Chemical & Engineering Data. 27 (1982) 439-442.
https://doi.org/10.1021/je00030a021
T / K =	288.15				Chart (double-click image to zoom in)
P / bar =	UNKNOWN (1.0132)
cᴘᴹ / J.mol⁻¹.K⁻¹	x₁
1.62	0.0102
2.38	0.0152
3.07	0.0198
3.24	0.0209
3.87	0.0252
4.53	0.0298
6.09	0.0412
7.01	0.0486
7.44	0.0519
7.56	0.0527
7.73	0.0543
8.94	0.0646
9.35	0.0688
11.45	0.0922
11.56	0.093
11.95	0.0996
12.65	0.11
13.14	0.1201
13.4	0.1275
13.7	0.1406
13.59	0.1502
13.91	0.1581
13.68	0.1695
13.81	0.1757
13.13	0.2021
13.31	0.2023
12.87	0.228
12.8	0.2311
12.45	0.2434
12.47	0.2454
12.38	0.2465
12.49	0.2493
12.14	0.2704
12.06	0.2759
11.96	0.2775
11.75	0.2993
11.09	0.3406
10.42	0.3845
9.79	0.4217
9.62	0.4358
8.66	0.5082
8.47	0.5266
7.56	0.5955
6.73	0.6579
5.93	0.7142
5.74	0.7255
4.3	0.8121
3.69	0.8427
2.33	0.9054
1.23	0.9498
Ogawa, Hideo - Murakami, Sachio, Excess isobaric heat capacities for water + alkanol mixtures at 298.15 K, Thermochimica Acta. 109 (1986) 145-154.
https://doi.org/10.1016/0040-6031(86)85016-X
T / K =	298.15				Chart (double-click image to zoom in)
P / bar =	UNKNOWN (1.0132)
cᴘᴹ / J.mol⁻¹.K⁻¹	x₁
3.594	0.025
6.966	0.05
9.904	0.075
12.008	0.1
13.842	0.1501
13.852	0.1501
14.008	0.2001
13.658	0.2501
13.146	0.3001
12.587	0.3501
11.99	0.4001
11.314	0.4501
10.66	0.5001
9.993	0.5501
9.264	0.6001
8.489	0.6501
7.705	0.7001
6.832	0.7501
5.876	0.8001
4.78	0.8501
3.448	0.9
1.848	0.95
Grolier, J.-P.E. - Wilhelm, Emmerich, Excess volumes and excess heat capacities of water + ethanol at 298.15 K, Fluid Phase Equilibria. 6 (1981) 283-287.
https://doi.org/10.1016/0378-3812(81)85011-X
T / K =	298.15				Chart (double-click image to zoom in)
P / bar =	UNKNOWN (1.0132)
cᴘᴹ / J.mol⁻¹.K⁻¹	x₁
2.56	0.0189
4.47	0.0325
6.67	0.0494
8.84	0.0671
9.73	0.0757
10.6	0.0845
11.99	0.1011
13.39	0.1255
13.83	0.1414
14.08	0.1982
13.75	0.2323
12.82	0.3349
11.45	0.4305
10.32	0.5075
9.58	0.5602
7.78	0.6712
7.29	0.6918
6.37	0.7418
4.42	0.8324
2.12	0.9201
Benson, George C. - D'Arcy, Patrick J., Excess isobaric heat capacities of water-n-alcohol mixtures, Journal of Chemical & Engineering Data. 27 (1982) 439-442.
https://doi.org/10.1021/je00030a021
T / K =	308.15				Chart (double-click image to zoom in)
P / bar =	UNKNOWN (1.0132)
cᴘᴹ / J.mol⁻¹.K⁻¹	x₁
2.15	0.0149
3.19	0.0218
4.83	0.0334
5.8	0.0412
8.59	0.0632
9.72	0.0738
10.91	0.0851
11.27	0.09
11.8	0.0994
12.8	0.1098
13.43	0.1242
13.96	0.1485
13.9	0.1485
13.95	0.1502
14.39	0.1757
14.48	0.202
14.34	0.2024
14.36	0.2281
14.32	0.2503
14.13	0.2503
14.14	0.2525
14	0.2792
13.61	0.3056
13.81	0.308
13.46	0.3355
13.37	0.3507
13.25	0.3507
13	0.3779
12.79	0.4048
12.49	0.4264
12.12	0.4567
11.46	0.5065
10.89	0.5465
10.82	0.5465
10.45	0.5707
10.09	0.6049
9.45	0.6432
9.33	0.6458
8.53	0.6952
7.65	0.7341
7.25	0.7561
6.15	0.8091
5.44	0.8337
4.2	0.8751
3.63	0.8946
3.6	0.8946
2.78	0.9222
2.03	0.9444
--------------------------------------------
Critical point
--------------------------------------------
Bazaev, A.R. - Abdulagatov, I.M. - Bazaev, E.A. - Abdurashidova, A., (p,v,T,x) Measurements of {(1−x)H2O+xC2H5OH} mixtures in the near-critical and supercritical regions, The Journal of Chemical Thermodynamics. 39 (2007) 385-411. doi:10.1016/j.jct.2006.08.002
T / K	P / bar	x₁
524.48	71.5	0.8
546.84	96.5	0.5
598.05	155	0.2
_x001A_

[truncated: 14 more sheets: 1104_1921, 1108_1105, 1301_1101, 1302_1921, 1760_1105, 1911_1772, 1911_1921, 1921_1109, 1921_1167, 1921_1181, 1921_1741, 1921_1772, 1921_2862, 1921_3854]
